# Amyloid $\beta$ -peptides interfere with mitochondrial preprotein import competence by a co-aggregation process

Giovanna Cenini, Cornelia Rüb, Michael Bruderek, Wolfgang Voos\*

Institut für Biochemie und Molekularbiologie (IBMB), Universität Bonn, Nussallee 11, 53115 Bonn (Germany)

\*Corresponding author:

Phone: +49-228-73 2426

Fax: +49-228-73 5501

Email: wolfgang.voos@uni-bonn.de

Character count (incl. spaces): 61.229

Running title: A $\beta$  peptides inhibit mitochondrial import

Keywords: Aggregation; Amyloid  $\beta$ -peptides; Mitochondrial protein import; Alzheimer disease

## Abstract

A $\beta$  peptides play a central role in the etiology of Alzheimer disease (AD) by exerting cellular toxicity correlated with aggregate formation. Experimental evidences showed an intraneuronal accumulation of A $\beta$  peptides and toxic effects on mitochondrial functions. Nevertheless, the relevance of intracellular A $\beta$  peptides in the pathophysiology of AD remained controversial. Here, we found that the two major species of A $\beta$  peptides, in particular A $\beta$ 42, exhibited a strong negative effect on the preprotein import reactions essential for mitochondrial protein biogenesis. However, A $\beta$  peptides only weakly interact with mitochondria and did not affect the inner membrane potential or the structure of the preprotein translocase complexes. A $\beta$  peptides significantly decreased the import competence of mitochondrial precursor proteins through a specific co-aggregation mechanism. Co-aggregation and import inhibition were significantly stronger in case of the longer peptide A $\beta$ 42, correlating with its importance in AD pathology. Our results demonstrate that a direct interference of aggregation-prone

A $\beta$  peptides with mitochondrial protein biogenesis represents a crucial aspect of the pathobiochemical mechanisms contributing to cellular damage in AD.

## Introduction

Beta-amyloid (A $\beta$ ) peptides have been associated with severe human pathological conditions like Alzheimer disease (AD) (Murphy & LeVine, 2010), Down syndrome (Head & Lott, 2004) and cerebral amyloid angiopathy (Weller et al, 2000), all characterized by accumulation and deposition of A $\beta$  peptides in the central nervous system. Due to the diversity of pathological aspects connected with a severe neuro-degenerative disease like AD, the biochemical mechanisms resulting in neuronal cell death and the correlation with the accumulation of A $\beta$  peptides are not completely clear (Musiek & Holtzman, 2015).

A $\beta$  peptides derive from a proteolytic process mediated by  $\beta$ - and  $\gamma$ -secretases on the type 1 trans-membrane precursor called amyloid precursor protein (APP). The most common forms in AD are constituted of 40 (A $\beta$ 40) and 42 (A $\beta$ 42)

amino acids (Zhang et al, 2011). Mutations, environmental factors as well as aging could induce changes in the equilibrium between A $\beta$  peptide production and removal (Mawuenyega et al, 2010) as well as an imbalance between amyloidogenic and non-amyloidogenic pathways (Agostinho et al, 2015). This causes an increase of A $\beta$  peptide concentrations promoting aggregation and deposition as senile plaques in brain parenchyma. Kinetic and structural studies about A $\beta$  aggregation *in vitro* have reported that unstructured A $\beta$  monomers have an intrinsic tendency to self-assemble spontaneously by a nucleation-polymerization mechanism into higher-order oligomeric, protofibrillar and fibrillar states (Thal et al, 2015). The aggregation process is enhanced by high peptide concentrations, presence of nucleation seeds, altered pH, ionic strength, or temperature (Stine et al, 2003). Furthermore, a large variety of post-translation modifications of the A $\beta$  sequence influence the aggregation propensity (Kummer & Heneka, 2014; Thal et al, 2015). As A $\beta$ 42 oligomers represent the most toxic amyloidogenic peptide species, the main component of AD senile plaques, and the first to deposit during the senile plaques formation, they play a key pathophysiological role in the development of AD (Haass & Selkoe, 2007). Interestingly, although A $\beta$ 42 has only small structural differences compared to the other A $\beta$  peptides, it displays distinct clinical, biological and biophysical behaviors (Bitan et al, 2003; Jarrett et al, 1993).

The “amyloid cascade hypothesis” represents the major theory to explain the etiology and pathology of AD (Hardy & Selkoe, 2002; Musiek & Holtzman, 2015). This hypothesis, strongly supported by genetic studies of familial AD cases (Hardy & Higgins, 1992), proposed that an aggregation of A $\beta$  peptides is responsible for the initiation of a multistep pathological cascade eventually resulting in neuronal death. A growing body of evidence also suggested the prominent contribution of an intracellular accumulation of A $\beta$  peptides as a trigger of neurodegeneration and AD pathology on the cellular level (Gouras et al, 2010; Wirths & Bayer, 2012; Wirths et

al, 2004). Based on their specific biochemical properties, it is likely that intracellular A $\beta$  peptides interact with membranes or other cellular components and induce structural changes of sub-cellular compartments (LaFerla et al, 2007).

Mitochondrial dysfunction is now consensually accepted as a general pathological feature in AD patients (Mattson et al, 2008; Piaceri et al, 2012; Selfridge et al, 2013). In line with this, a modification of the amyloid cascade hypothesis was postulated that support the correlation between mitochondrial dysfunction with AD. Named “mitochondrial cascade hypothesis”, it considers how individual mitochondrial dysfunctions, accumulating in aging cells, could influence A $\beta$  peptide homeostasis, aggregation and consequently the chronology of AD (Swerdlow et al, 2014). However, it is still disputed if mitochondrial dysfunctions are early casual events or a consequence of other pathological events in AD patients. Evidences exist that indicate an accumulation of A $\beta$  peptides in mitochondria, interactions with protein components of the mitochondrial matrix, and perturbations of mitochondrial functions (Hansson Petersen et al, 2008; Kaminsky et al, 2015; Lustbader et al, 2004; Mossmann et al, 2014). Nevertheless, the molecular mechanisms behind the accumulation and the effects of A $\beta$  peptides on mitochondria need a critical analysis and clarification. For this reason, we elucidated the biochemistry of the interaction between the two A $\beta$  peptides species relevant to AD (A $\beta$ 40 and A $\beta$ 42) with human mitochondria. One of the major cellular processes responsible for maintaining mitochondrial functions is the import of nuclear-encoded mitochondrial precursor proteins from the cytosol (Chacinska et al, 2009). In order to check if and how A $\beta$  peptides directly interfere with the mitochondrial protein import reaction, we utilized an established import assay with isolated intact mitochondria (Ryan et al, 2001). Taken together, our results show a strong and direct inhibitory effect of A $\beta$  peptides on mitochondrial protein biogenesis. This inhibition is not caused by a damaging influence of A $\beta$  peptides on mitochondrial

functions, but is correlated to an extra-mitochondrial aggregation phenomenon between A $\beta$  peptides and precursor proteins that severely restricts their import competence.

## Results

### A $\beta$ peptides interfere with the import of mitochondrial precursor proteins

The import of precursor proteins, synthesized at cytosolic ribosomes, represents a crucial process in maintaining mitochondrial function and activity. In order to test a direct effects of A $\beta$  peptides on mitochondrial protein import, we utilized an established *in organello* assay system that measures the uptake of radiolabeled mitochondrial precursor proteins into intact mitochondria isolated from human cell cultures. This assay enables to directly follow the association, the uptake and the processing of precursor proteins into mitochondria (Chacinska et al, 2009; Ryan et al, 2001).

As precursor proteins, we used the following radio-labeled [<sup>35</sup>S] polypeptides: mitochondrial malate dehydrogenase (MDH2), a key enzyme for the citric acid cycle; ornithine carbamoyltransferase (OTC) involved in the urea cycle; and artificial, mitochondrially targeted fusion proteins, Su9(86)-DHFR and Su9(70)-DHFR, comprising the presequence of the subunit 9 (Su9) of the F<sub>1</sub>F<sub>0</sub>-ATP synthase (86 and 70 AA respectively) from *Neurospora crassa* fused to the complete mouse dihydrofolate reductase (DHFR). All these precursor proteins contain an N-terminal presequence that is cleaved by the mitochondrial processing peptidase (MPP) after the polypeptide reaches the matrix compartment. Their mitochondrial import depends on the membrane translocase complexes TOM (T<sub>r</sub>anslocase of the Outer Mitochondrial membrane) and TIM23 (T<sub>r</sub>anslocase of the Innner Mitochondrial membrane with the core component Tim23) and a functional inner membrane potential ( $\Delta\psi$ ) (Chacinska et al, 2009). In addition, we tested a precursor protein of the metabolite carrier family, the adenine nucleotide translocator 3 (ANT3). This

protein is constituted by highly hydrophobic transmembrane subunits and lacks an N-terminal presequence. ANT3 is inserted into the inner mitochondrial membrane (IMM) and its import uses a distinct pathway that depends on the TOM and TIM22 complexes and (Truscott et al, 2002).

In our import assay, we used the most relevant A $\beta$  peptides found in AD cases, constituted by 40 (A $\beta$ 40) and 42 (A $\beta$ 42) amino acids. We prepared the A $\beta$  peptides according to a protocol optimized by Stine et al (Stine et al, 2003). The A $\beta$  peptides and the radiolabeled precursor protein were incubated together with energized human mitochondria isolated from cultured HeLa cells lines. After the import incubation, samples were treated with proteases to digest residual non-imported polypeptides represented by the precursor form (*p*), and leaving the completely imported and processed mature form (*m*). Then, import reactions were analyzed by tricine SDS-PAGE and Western blot followed by autoradiography to detect the <sup>35</sup>S-labeled imported polypeptides, while the presence of A $\beta$  peptides was detected by immunodecoration with a specific antibody against A $\beta$ . As ANT3 does not contain a N-cleavable presequence and is not processed in the matrix, completed import was analyzed by Blue-Native Page (BN-PAGE) indicating the formation of a dimeric complex after insertion into the inner membrane.

We found that A $\beta$  peptides strongly interfered with the mitochondrial import of all precursor proteins analyzed (Figure 1). The two A $\beta$  peptides showed a different degree of inhibitory effect. Using the same concentration, A $\beta$ 40 partially inhibited the import reaction (Figure 1A), while A $\beta$ 42 completely inhibited it (Figure 1B) as indicated by the absence of the mature (*m*) form of a fully imported and processed precursor protein. ANT3 import was analyzed by BN-PAGE to visualize the  $\Delta\psi$ -dependent formation of the inner membrane dimeric complex around 148 kDa (Figure 1C, lane 1). Also in this case, A $\beta$  peptides were able to inhibit to different extent the complex formation and therefore ANT3 import. Again A $\beta$ 42 was more effective in inhibiting the import

reaction compared to A $\beta$ 40. The inhibitory effect of the A $\beta$ 42 resulted in a full elimination of the generation of mature forms as well as a complete protease sensitivity of the precursor protein in the import reaction. Taken together, these two criteria indicate a full block of the mitochondrial translocation process and a general phenomenon affecting different import pathways.

In order to investigate the concentration-dependence of the inhibitory effect of A $\beta$  peptides on mitochondrial import, we performed a titration of A $\beta$  peptides amount during the [ $^{35}$ S]-Su9(86)-DHFR import assay (Figure 1D and Supplemental Figure EV1). After import, samples were digested by trypsin (100  $\mu$ g/ml) and analyzed by tricine SDS-PAGE, autoradiography and Western blot. We quantified the protease-resistant mature form (*m*) of the imported [ $^{35}$ S]-Su9(86)-DHFR. We found that the inhibitory effect of A $\beta$ 42 was about ten fold stronger than A $\beta$ 40. Inhibition of import by A $\beta$ 42 started at a concentration of about 0.1  $\mu$ M, while for A $\beta$ 40 a concentration of more than 1  $\mu$ M was required. It should be noted that only at the highest concentration, the A $\beta$ 40 band was detectable also in the mitochondrial fraction (Supplemental Figure EV1).

### **A $\beta$ peptides do not interfere with general mitochondrial functions**

Since it was previously reported that *in vitro* A $\beta$  peptides exert direct damage on mitochondria (Hansson Petersen et al, 2008; Lustbader et al, 2004; Mossmann et al, 2014), we assayed the state of specific import-related mitochondrial functions in our experimental setup. An electric potential across the mitochondrial inner membrane ( $\Delta\psi_{mt}$ ) is indispensable for the mitochondrial import of precursor proteins into the matrix as well as the insertion into the inner membrane (Ryan et al, 2001). We measured the  $\Delta\psi_{mt}$  in our model by the potential-dependent accumulation of the fluorescent dye tetramethylrhodamineethyl ester (TMRE) after incubation of isolated and energized mitochondria with increasing amounts of A $\beta$  peptides (Figure 2A). Both A $\beta$ 40 and A $\beta$ 42 did not exhibit any effect on  $\Delta\psi_{mit}$ , even at high concentrations. As negative

control, we incubated the mitochondria with 0.5  $\mu$ M of valinomycin that causes a complete dissipation of the membrane potential and a concomitant strong reduction of the fluorescence signal. Using native conditions (BN-PAGE), we inspected the structure and the composition of translocase complexes responsible for the import reaction. In the BN-PAGE, the translocase complexes of both the outer membrane (TOM) and the inner membrane (TIM23) migrate as distinct high-molecular weight bands. Incubations with both A $\beta$  peptides did not have any visible effect on the running behavior of the translocase complexes, indicating no significant change in structure and composition (Figure 2B). Furthermore, the absence of effects in the native PAGE indicated that there is no significant stable interaction between the mitochondrial import complexes and A $\beta$  peptides themselves. It should be noted that in the Western blots of the BN gels (Figure 2B), a signal localized in the upper part of the stacking gel appeared for A $\beta$ 42, but not for A $\beta$ 40 consistent with a formation of high molecular weight aggregates. Additionally, we also checked the running behaviors of the five respiratory chain complexes of the inner membrane in native PAGE and again found no significant differences caused by the presence of A $\beta$  peptides (Supplemental Figure EV2). These results demonstrated that A $\beta$  peptides did not negatively affect mitochondrial activities that are directly relevant for the import reaction. In line with this, resistance of mitochondrial control proteins against Proteinase K (PK) treatment after import also suggests that mitochondrial membranes remained largely intact after A $\beta$  treatment.

### **A $\beta$ peptides affect the initial steps of the mitochondrial import reaction**

Based on the observation of a significant inhibition of the overall import process, we set out to identify the particular step of the import reaction was affected by A $\beta$  peptides. Most cases of the precursor protein import can be generally distinguished into three steps: a) binding to the receptors of the import machinery of

the outer mitochondrial membrane (OMM); b)  $\Delta\psi_{mit}$ -dependent transport through the membranes via the translocase complexes; c) processing of the precursor to the mature form. To investigate the effect of A $\beta$  peptides on the initial step of the import reaction, we dissipated the  $\Delta\psi_{mit}$  as an import driving force, allowing only binding of precursor proteins to OMM import receptors and/or insertion into the TOM translocase channel. As the OMM binding reaction is very quick, we incubated the isolated mitochondria with the radioactive precursor protein for short times (range of seconds) in presence of A $\beta$  peptides and tested for a co-fractionation of the precursor polypeptides with the mitochondria. Both A $\beta$  peptides did not negatively affect the binding between the precursor protein [<sup>35</sup>S]-Su9(86)-DHFR (Figure 3A) and the mitochondria, indicating that the interaction with the mitochondrial surface receptors was not affected. On the other hand, in particular with A $\beta$ 42, we consistently observed elevated amounts of precursor protein associated with mitochondria that are proportional to the amount of peptide used (Figure 3B). Since also non-specific radioactive protein bands generated during *in vitro* translation in addition to the genuine precursor band were found in association with the mitochondrial pellet after centrifugation, the increase in signal intensity of the precursor protein is probably due to an aggregation phenomenon (see below).

Transport and processing reactions were tested utilizing a two-step protocol that separated the binding of the precursor from the actual translocation process. The precursor protein [<sup>35</sup>S]-Su9(70)-DHFR was first incubated with mitochondria where the  $\Delta\psi_{mit}$  was dissipated by the addition of CCCP (1  $\mu$ M). In this way, the precursor protein was able to bind to the TOM machinery without being imported. After removing excess unbound precursor proteins,  $\Delta\psi_{mit}$  was restored by taking away the CCCP by binding it to excess amounts of albumin (BSA) and re-energizing the mitochondria, allowing the translocation and processing reaction to proceed. Interestingly, an inhibition of protein import was only observed when A $\beta$  peptides were present already in the first

step of the experiment, (Figure 3C, lanes 11 and 12). While adding the peptides directly in the second step, after the binding step has been completed, did not show any effect on the import reaction (Figure 3C, lanes 17 and 18). This directly demonstrated that A $\beta$  peptides did not negatively affect the later phases of the import reaction, but rather interfered with the first steps of the import reaction that happen at the outer face of the OMM.

### Interaction of A $\beta$ peptides with human mitochondria

An association with mitochondria or even an import of A $\beta$  peptides has been claimed already in previous publications (Hansson Petersen et al, 2008; Lustbader et al, 2004; Pagani & Eckert, 2011), although the underlying mechanism of interaction and functional consequences remained ambiguous. In our own experiments, we observed an apparent interaction between A $\beta$  peptides with mitochondria in particular A $\beta$ 42 co-purifying with mitochondria more than A $\beta$ 40 suggesting a potential association. Since also the degree of import inhibition correlated with the amount of A $\beta$  peptides co-purified with mitochondria, we checked if A $\beta$  peptides maintain the same behavior even in absence of precursor protein. More in details, we pre-treated the isolated mitochondria with A $\beta$  peptides for 30 minutes followed by different washing steps to remove excess unbound material. Then, we performed a normal import reaction using the precursor protein [<sup>35</sup>S]-Su9(86)-DHFR (Figure 4). Interestingly, a pre-treatment of mitochondria with A $\beta$ 40 did not significantly show any co-purification A $\beta$ -mitochondria and did not affect a later import reaction. On the contrary, the pretreatment with A $\beta$ 42 showed a co-purification and a strong, although not complete, inhibitory effect on the import reaction. Furthermore, we were able to detect A $\beta$ 42 co-purifying with the mitochondria even after extensive washing, confirming an association with mitochondria.

We investigated in detail the biochemical properties of this association of A $\beta$  peptides with isolated mitochondria. First, we performed a standard

mitochondrial import experiment using A $\beta$  peptides to clarify if they were taken up via the canonical import pathway. The import reaction was analyzed by tricine SDS-PAGE followed by Western blot using antiserum against A $\beta$  peptides. As shown in Figure 5A, the smaller peptide A $\beta$ 40 did not show a significant co-purification with mitochondria even at longer incubation times. In contrast like seen before, with A $\beta$ 42, a band of 4 kDa was visible in the samples containing mitochondria already at very short time points (Figure 5B). The band intensity did only slightly increase with longer incubation times. Due to the small size and the specific properties of the A $\beta$  peptides, any processing event during the import reaction was not expected. However, for A $\beta$ 42 an additional band with a slightly higher molecular weight appeared in the presence of mitochondria, which is likely due to a different running behavior of the small peptide in presence of high amounts of mitochondrial proteins or lipids. However, two observations argue strongly against a specific uptake of A $\beta$  peptides via the mitochondrial import machinery: a) the intensity of the co-purifying A $\beta$  signal was not influenced by  $\Delta\psi_{mit}$  (Figure 5B, lane 11) and b) both A $\beta$  peptides showed a comparable signal also in the mock sample containing no mitochondria at all (Figure 5A and 5B, lanes 6 and 12). Interestingly, both the co-purifying materials as well as the peptides in the mock samples were largely resistant to protease digestion (Figure 5A and 5B, lanes 1-6).

As protection against proteases is a major hallmark of a successful mitochondrial import reaction (Ryan et al, 2001), we characterized the protease digestion behavior of A $\beta$  peptides in more detail (Figure 6A). We incubated the A $\beta$  peptides with isolated and energized mitochondria followed by solubilization with 0.5% Triton X-100 (Figure 6A, lanes 5-8) or ultra-sonication (Figure 6A, lanes 9-12). Under these conditions, the mitochondrial membranes are disrupted and would not be able to offer protection against external proteases. A titration with rising amounts of trypsin was performed and then all the samples underwent trichloroacetic acid (TCA) precipitation,

tricine SDS-PAGE and detection of present A $\beta$  peptides by western blotting. As showed in control panels, both detergent- and sonication-lysis of mitochondria were successful as endogenous control proteins were efficiently degraded even at the lowest concentration of trypsin (5  $\mu$ g/ml). In the mock samples, without mitochondria and used as control, we again found a significant protease resistance of both A $\beta$  peptides (Figure 6A, lanes 1-4). The protease resistance of both A $\beta$  peptides was decreased in presence of detergent or after ultrasound treatment (Figure 6A, lanes 6-8 and 10-12). A $\beta$ 42 was found slightly more resistant than A $\beta$ 40 after detergent lysis, but remained completely resistant to trypsin after ultrasound treatment. In presence of mitochondria, the behavior of the two peptides was different. As A $\beta$ 40 did not co-purify or pellet with mitochondria, the analysis of A $\beta$ 40 susceptibility to protease digestion was not possible. In contrast, A $\beta$ 42 showed some co-purification with the mitochondria and also a complete protease resistance that was neither affected by the presence of detergent nor by sonication. This specific intrinsic protease resistance and the band of A $\beta$  peptides still visible in samples without mitochondria (mock) or even after destruction of mitochondrial membranes and proteins suggest that in our experimental setup A $\beta$  peptides are more prone to form sedimentable aggregated material than to associate with the OMM.

The import of nuclear-encoded precursor proteins initially requires a specific interaction with receptor proteins at the surface of the OMM (Endo & Kohda, 2002). To analyze if the interaction of A $\beta$  peptides with mitochondria depends on the involvement of the OMM receptors, we pre-treated isolated intact mitochondria with trypsin to digest any protein domains exposed on the cytosolic face of the outer membrane. Then, we incubated the mitochondria with A $\beta$  peptides (Figure 6B). Samples were analyzed by tricine SDS-PAGE followed by Western blot. As control, Tom20 was degraded at the lowest trypsin concentration (5  $\mu$ g/ml), while the inner membrane protein Tim23 was stable during both protease

treatments indicating the intactness of mitochondria. The co-purified amount of A $\beta$ 42 with mitochondria did not show any difference between trypsin pre-treated mitochondria versus untreated control samples, indicating that any potential interaction of A $\beta$ 42 with mitochondria is not based on a specific binding to the import-related receptor proteins of the TOM complex.

The previous experiments suggest that the association of A $\beta$  peptides with mitochondria rather represents a non-specific interaction with the OMM. We performed an alkaline extraction to assess the membrane interaction properties after incubating A $\beta$  peptides with mitochondria, (Figure 6C). During alkaline extraction, polypeptides that stably associate with membranes remain in the pellet fraction (P), while peripheral membrane proteins are found in the supernatant (S). As shown before, A $\beta$ 40 did not show a significant signal in presence of mitochondria. However, the mock samples showed that minor amounts of A $\beta$ 40 accumulated in the pellet fraction consistent with a generation of small amounts of protein aggregates. The A $\beta$ 42 peptides showed a similar behavior in the mock samples. However, in the presence of mitochondria, a significant amount of co-purified material was found in the supernatant fraction excluding integration into the OMM, suggesting at most a peripheral association. The mitochondrial control proteins MPP (soluble) and Tom40 (membrane-integrated) behaved as expected. A non-specific interaction with the OMM, in particular for A $\beta$ 42, was also supported by a saturation titration experiment (Figure 5C and 5D). Here, we incubated increasing amounts of A $\beta$  peptides with a constant amount of mitochondria and separated soluble and insoluble material by intermediate-speed centrifugation. Increasing the peptide concentration, most of the A $\beta$ 40 peptide remained in the supernatant and only a minor amount appeared in the pellet fraction (Figure 5C) without being influenced by the presence of mitochondria. On the other hand, significant amounts of A $\beta$ 42 peptides accumulated in the pellet fraction, both in presence or absence of mitochondria

(Figure 5D). In both cases, the amount of A $\beta$ 42 peptides recovered in the pellet fractions did not seem to be saturable, indicating again a non-specific mitochondrial association as well as a pronounced tendency to form sedimentable aggregate material.

From the results above, it was not possible to clearly distinguish between A $\beta$  peptides associated to the OMM and A $\beta$  peptides prone to aggregation that are able to sediment with mitochondria by conventional differential centrifugation methods used in a standard import assay. Thus, we decided to analyze the behavior of A $\beta$  peptides during the mitochondrial import using a specific rate-zonal centrifugation method. Using sucrose gradients (20-50%) the particles are separated by their size and density. After performing an import reaction of precursor protein [<sup>35</sup>S]-Su9(70)-DHFR in presence or absence of A $\beta$  peptides, samples were separated by centrifugation through the sucrose gradient. Fractions from top to bottom were collected and analyzed by Western blot or autoradiography for the presence of the imported precursor protein or A $\beta$  peptides. As controls, we carried out the same experiment in the absence of mitochondria (mock) or in the absence of A $\beta$  peptides (Figure 7B). From the sedimentation behavior of mitochondrial marker MPP and Tim23, isolated mitochondria were concentrated mostly around the middle of the gradient (Figure 7, fractions 12-14). Most of A $\beta$ 40 accumulated as monomer or as small, low density and SDS-soluble aggregates at the top of the gradient and no co-sedimentation with the mitochondria was observed. This observation is consistent with the behavior in the differential centrifugation experiments previously reported (Figure 7A, upper panels). However, A $\beta$ 42 behaved significantly different (Figure 7A, middle panels). In presence of isolated mitochondria, a small percentage of A $\beta$ 42 was found in the gradient fractions together with the mitochondrial markers, suggesting a direct interaction with mitochondria. In the mock samples, most of A $\beta$ 42 accumulated on the top of the gradient like A $\beta$ 40. In the control import containing only the precursor protein, [<sup>35</sup>S]-Su9(70)-DHFR

showed a localization of the mature form (*m*) in the same fractions as the bulk mitochondria (Figure 7B). As expected, in presence of A $\beta$ 40 the amount of mature form was partially reduced (Figure 7C), while A $\beta$ 42 treatment resulted in a complete disappearance of the mature form, demonstrating again a complete inhibition of mitochondrial import (Figure 7D). Interestingly, in presence of the precursor protein, the amount of A $\beta$ 42 bound to the mitochondria was strongly reduced and a band in the bottom of the gradient is appearing for both A $\beta$ 42 and [ $^{35}$ S]-Su9(70)-DHFR (Figure 7D, lane 23).

Taken together all these data suggest that there is a differential behavior of the two A $\beta$  peptides concerning their interaction with mitochondria. Under the experimental conditions used, A $\beta$ 40 did not show a significant interaction with mitochondria and also only a small aggregation propensity was detected. In contrast, A $\beta$ 42 exhibited a small but significant non-specific association with the mitochondrial surface and also a significant tendency to form aggregate assemblies. Interestingly, in presence of mitochondrial precursor proteins, the association of A $\beta$ 42 with the mitochondria was reduced together with an increased formation of potential sedimentable preprotein-A $\beta$ 42 co-aggregates.

### **Preprotein import competence is reduced by the formation of A $\beta$ -preprotein co-aggregates**

As aggregate formation is a pathological intrinsic property of A $\beta$  peptides (Thal et al, 2015), we reasoned that the induction of preprotein aggregation and the reduction of their solubility in presence of A $\beta$  peptides might significantly contribute to the inhibitory effect on the import reaction. We therefore analyzed the co-aggregation by three types of assays: i) high-speed centrifugation followed by tricine SDS-PAGE, ii) filter retardation assay, and iii) blue-native PAGE (BN-PAGE). These techniques provide direct information about the aggregation behavior of precursor polypeptides in the presence of the A $\beta$  peptides and partially characterize the nature of the aggregates. After incubation of radiolabeled precursor

proteins with A $\beta$  peptides, samples were centrifuged at high speed (45000 rpm; 124500 xg) to separate the insoluble high-molecular weight aggregates from the soluble proteins. The resulting pellets and supernatants were analyzed by Western blot and immunodecoration against A $\beta$  peptides, as well as autoradiography to detect the precursor polypeptides (Figure 8A). The precursor protein alone partially fractionated to the pellet suggesting an intrinsic aggregation propensity (Figure 8A, lanes 7 and 17). However, in presence of rising concentrations of A $\beta$ 42, the amounts of [ $^{35}$ S]-Su9(86)-DHFR found in the pellet was significantly increased (Figure 8A, lanes 18-20). In contrast, A $\beta$ 40 had less severe effects on the distribution of precursor polypeptides in the centrifugation assay (Figure 8A, lanes 8-10) where most precursor protein remained soluble in the supernatant (Figure 8A, lanes 3-5). A $\beta$ 42 itself was mostly found in the pellet fraction suggesting a strong propensity to form insoluble aggregates (Figure 8A, lanes 16,18-20). In the pellet fraction, but not in the supernatant, an additional band was detected for A $\beta$ 42 at the top part of the PDVF membrane corresponding to the loading pockets of the tricine gel. This suggested that A $\beta$ 42 formed high-molecular weight aggregates that were insensitive to SDS solubilization. For A $\beta$ 40, part of the peptides sedimented as insoluble aggregates (Figure 8A, lanes 6,8-10) and part remained soluble in the supernatant (Figure 8A, lanes 1,3-5). In the supernatant fraction, A $\beta$ 40 showed two bands around 20 kDa and 35 kDa in addition to the predominant band at 4 kDa (Figure 8A, lanes 3 and 4). These bands were present only when A $\beta$ 40 was incubated with the precursor proteins, but not with the peptides alone. Similar bands were also detected with A $\beta$ 42, but in much lower amounts (Figure 8A, lanes 12 and 13).

In the filter retardation assay, different amounts of A $\beta$  peptides were incubated with the [ $^{35}$ S]-Su9(86)-DHFR (Figure 8B) or [ $^{35}$ S]-OTC (Supplemental figure EV3) and subsequently filtered through nitrocellulose or cellulose acetate membranes. With the cellulose acetate membrane, which does not have an



intrinsic protein binding affinity, inclusions or aggregates bigger than 0.2  $\mu\text{m}$  are trapped under these conditions, while the smaller complexes pass through and are washed away (Heiser et al, 2000). As most of the added protein should be retained on a nitrocellulose membrane, this type of membrane was used as loading control. Precursor proteins were detected by autoradiography and the presence of A $\beta$  peptides by immunodecoration. The total amount of retained polypeptides was also evaluated by Ponceau red staining of the membranes. As expected from their intrinsic aggregation propensities, A $\beta$ 42, but not A $\beta$ 40, showed a signal on cellulose acetate membranes, when similar concentrations were loaded (Figure 8B). While the precursor protein [<sup>35</sup>S]-Su9(86)-DHFR alone showed a light signal on cellulose acetate membrane, a strong signal was detected when it was incubated together with A $\beta$ 42 (Figure 8B). The formation of the precursor protein aggregates increased with the amount of A $\beta$ 42 peptides added. [<sup>35</sup>S]-OTC showed a similar behavior (Supplemental Figure EV3).

We also applied the samples on BN-PAGE to characterize the complex formation between A $\beta$  peptides and precursor proteins under native condition. After incubation of the [<sup>35</sup>S]-Su9(86)-DHFR with different concentrations of A $\beta$  peptides, the complete samples were separated by BN-PAGE gradient gel (5-16.5%) and then analyzed by Western blot and autoradiography. The precursor protein [<sup>35</sup>S]-Su9(86)-DHFR alone distributed over a large size range without forming a defined band, a typical behavior for a soluble protein in native PAGE (Figure 8C, lanes 2 and 9). In presence of A $\beta$ 40, some of the precursor proteins shifted to a higher molecular weight zone of the gel in a concentration-dependent manner (Figure 8C, lanes 3-7). In presence of A $\beta$ 42, the signals of the precursor protein almost exclusively shifted to an area around 720 kDa (Figure 8C, lanes 10-13). Interestingly, the immunodecoration with anti-A $\beta$  serum showed that some A $\beta$ 42 material accumulated at the same molecular weight range (Figure 8C, lanes 10 and 11). In

addition, A $\beta$ 42 also exhibited a signal at the highest part of the membrane related to the loading pockets in the gel, representing large insoluble aggregate material (Figure 8C lanes 8, 10-12). The fact that in native conditions the precursor protein band together with A $\beta$ 42 band shifted to the same area strongly suggests a direct interaction between the precursor protein and A $\beta$ 42. The large size of the complex, comprising multiple copies of both molecules was consistent with the formation of A $\beta$ 42-preprotein co-aggregates.

Taken together, the data obtained from three different technical approaches clearly confirmed a co-aggregation phenomenon between the precursor proteins and A $\beta$  peptides that reduced the precursor proteins solubility. As solubility of the precursor proteins is a requirement for an efficient mitochondrial import, a formation of co-aggregates between the precursor proteins and A $\beta$  peptides interferes with the insertion of the precursor protein inside the TOM channel. This represents the initial step of an import reaction that was found defective in our experiments in presence of A $\beta$  peptides. Notably, the two A $\beta$  peptides analyzed showed different effects on co-aggregate formation, correlating well with the observed preprotein inhibition efficiency, their aggregation propensity and also the pathological impact in AD patients.

## Discussion

An intracellular localization together with their intrinsic physicochemical properties encourages A $\beta$  peptides to interact with organelles such as mitochondria. Indeed, it was previously observed that A $\beta$  peptides a) localize to mitochondria from postmortem AD brains and from several experimental models of the disease (Pagani & Eckert, 2011), b) physically interact with some mitochondrial components (Lustbader et al, 2004) and c) exert harmful effects on mitochondrial function (Kaminsky et al, 2015). Interestingly, unlike plasma membrane, endoplasmic reticulum (ER), trans-Golgi network and endosome-lysosome system, mitochondria are completely deprived of the amyloid precursor protein (APP) and

the metabolic enzymes responsible to release A $\beta$  peptides from the precursor (Sannerud & Annaert, 2009). As an *in situ* production of A $\beta$  peptides in mitochondria themselves seems biochemically unlikely, our study addressed the possible mechanisms of A $\beta$  peptide interaction with mitochondria as well as the correlation between a mitochondrial localization of A $\beta$  peptides and the mitochondrial dysfunctions observed in AD.

Under *in organello* conditions, we observed a clear-cut and strong inhibitory effect of A $\beta$  peptides on mitochondrial import. The inhibitory effect of the A $\beta$ 42 was significantly stronger than the related A $\beta$ 40, correlating well with the stronger pathogenic effect of A $\beta$ 42 in human AD patients (Eckman & Eckman, 2007). Notably, the lowest A $\beta$ 42 concentration that resulted in a significant inhibition of mitochondrial import was comparable to the concentration of the peptide that have previously found in AD brains (2  $\mu$ M for A $\beta$ 42 and 200 nM for A $\beta$ 40 (Roher et al, 2009). Our experiments also shed a light on the biochemical details of the inhibitory mechanism, in particular which stage of the import process was affected. The inhibitory effect occurred immediately and did not require a prolonged preincubation period. Although previous publications reported that a treatment of mitochondria with A $\beta$  peptides resulted in a reduction of the  $\Delta\psi_{mit}$  (Kaminsky et al, 2015), in our model system we did not observe any changes in  $\Delta\psi_{mit}$  in the time-frame of the import experiments, excluding an A $\beta$ -related reduction of the membrane potential as a cause for the import inhibition. Neither did we observe changes in the size and composition of the precursor protein translocase complexes in the outer or the inner membrane (TOM and TIM) that are responsible for the precursor protein translocation reaction. Similarly, also the metabolic complexes of the respiratory chain were not affected. The possibility of a direct physical damage on mitochondrial membranes, the oxidative phosphorylation system or the preprotein import machinery by A $\beta$  peptides is very unlikely.

Up to date only scarce information is available about direct effects of A $\beta$  peptides on the mitochondrial protein

biogenesis process. Using flow cytometry, it was demonstrated that after long-term exposure to A $\beta$  peptides, differentiated PC12 cells exhibited a reduction of newly synthesized mitochondrially-targeted GFP (Sirk et al, 2007). These results are generally in line with our observations, however, due to the long exposure to potentially toxic molecules, these experiments could not distinguish if the import inhibition was a direct or indirect consequence of the presence of A $\beta$  peptides. The immediate inhibitory effect of A $\beta$  peptides on the import reaction in healthy mitochondria, as observed in our experiments, essentially rules out that the inhibition was caused indirectly by a long-term accumulation of functional defects in the affected mitochondria. A single previous study also used isolated mitochondria pretreated for short time with A $\beta$  peptides, but did not detect a deficiency of the mitochondrial import (Hansson Petersen et al, 2008). Considering the concentration-dependency of A $\beta$  peptides effect on mitochondrial import, the discrepancy between our results and the previous results could be explained only by the amount of A $\beta$  peptides used. Indeed, in these experiments a concentration of A $\beta$  peptides around 0.1  $\mu$ M was used that were not sufficient to observe a significant import inhibition according to our observations. Interestingly, a defect in mitochondrial protein biogenesis as a potential cause for neurodegenerative disorder was also observed in other pathological situations. It was observed that a mutant form of the protein huntingtin (HTT), involved in Huntington's disease (HD), partially inhibited mitochondrial import through a physical association with TIM23 translocase complexes and lead to neuronal death in a HD mouse model. The import inhibition was concentration dependent and the concentration of the huntingtin used was comparable to the A $\beta$  peptides concentration used in our model (Yano et al, 2014).

It should be noted that an alternative mechanism of AD-related inhibition of mitochondrial precursor protein import had been suggested previously (Anandatheerthavarada et al, 2003; Devi et al, 2006). Here, the precursor protein of

A $\beta$  peptides, APP, was shown to interact with the TOM complex and to undergo an incomplete translocation reaction (*in organello* model). The authors suggested that APP would thereby block the translocation of other authentic precursor proteins resulting in the development of mitochondrial dysfunction. However, the significance of this possibility is unclear as APP is typically localized in the cell as an integral membrane protein in the plasma membrane, endosome and ER. Although some mistargeting of ER proteins to mitochondria cannot be excluded, the overall probability would be very low and therefore unlikely to result in a major functional defect.

A recent study proposed that A $\beta$  peptides indirectly interfered with the processing of imported precursor proteins to the mature and active forms (Mossmann et al, 2014), which is an important late step of the mitochondrial import reaction. The proposed model was based on a report that A $\beta$  peptides are degraded by PreP, a peptide-degrading enzyme in the mitochondrial matrix (Falkevall et al, 2006). The authors claimed that an inhibition of PreP (or its yeast homolog Cym1) by A $\beta$  peptides (Alikhani et al, 2011) would result in the accumulation of prepeptides in the mitochondrial matrix that in turn would interfere with the activity of the processing peptidase MPP, required for the maturation of mitochondrial precursor proteins. Eventually this would lead to an accumulation of non-functional mitochondria as observed in AD. This is in strong contrast to our study that showed that A $\beta$  peptides acted on an early step of the import reaction, since the precursor proteins failed to acquire a protease-protected localization under all circumstances. Two observations from our study directly argue against a mitochondrial processing defect caused by A $\beta$  peptides. i) The precursor form visible in import experiments after A $\beta$  peptide inhibition was always sensitive to digestion by external proteases, indicating that the preproteins never crossed the mitochondrial membranes, consistent with a complete translocation defect. ii) Using two-step import experiments, which separated the binding from the

translocation and processing reaction, we observed an inhibitory effect of A $\beta$  peptides only in the first step that is independent of the membrane potential, but not in the second translocation step into the matrix that would also comprise the processing reaction. Although Mossmann et al. found an impaired precursor protein processing activity in presence of A $\beta$  peptides using soluble mitochondrial extracts from yeast as well as in total brain extracts from PS2APP mice, a murine model of AD, the relevance of the claimed processing inhibition for the *in vivo* situation is questionable. In addition to the use of soluble extracts instead of intact organelles, very high concentrations of A $\beta$  peptides (10  $\mu$ M) were utilized in these experiments to result in any significant processing inhibition. Mossmann et al. also observed a very minor accumulation of precursor polypeptides after cellular expression of A $\beta$  in intact yeast cells and also in brain extracts from AD patients. However, as a cytosolic accumulation of unprocessed precursor forms is the typical hallmark of a defective overall import process instead of just a faulty processing reaction, these observations are even consistent with our results of a direct inhibitory A $\beta$  peptides effect.

Despite any obvious deleterious effects on mitochondrial functions, we observed that a pretreatment of intact mitochondria with A $\beta$ 42 (but not A $\beta$ 40) resulted in a later reduction of preprotein import efficiency even when the A $\beta$  peptide was removed, albeit not a complete inhibition when present during the import incubation per se. This indicated that at least some of the A $\beta$ 42 peptide would be able to interact and bind to mitochondria. Although previous experiments indicated a specific and complete import of A $\beta$  peptides into mitochondria (Hansson Petersen et al, 2008), we revisited this question by analyzing the biochemical properties of the interaction of A $\beta$  peptides with isolated and energized mitochondria. Considering that A $\beta$  peptides lack the typical properties of mitochondrial targeting sequences, it is questionable if a specific interaction or even an uptake by mitochondria might take place. Nevertheless, also in our

experiments A $\beta$ 42 exhibited some co-sedimentation with mitochondria during differential centrifugation typically used to re-isolate mitochondria after an import experiment. In contrast, the shorter A $\beta$ 40 peptide did not show a significant association with mitochondria in all used assays. In addition, the co-sedimenting A $\beta$ 42 showed some degree of resistance against added proteases. Superficially, both observations might argue for a successful import reaction.

However, our experimental results clearly show that both A $\beta$  peptides are not imported into mitochondria because they do not completely satisfy the required criteria of mitochondrial import reaction. Most importantly, the sedimentation of A $\beta$ 42 was largely maintained in the absence of mitochondria (mock samples), correlating with its intrinsic tendency to form aggregates. As the removal of outer membrane protein components by a protease pre-treatment did not change the co-sedimenting amount of A $\beta$ 42, we exclude any specific interaction between A $\beta$  peptides and proteinaceous components of the OMM, in particular the cytosol-exposed receptors of import machinery. In addition, the amount of co-purifying A $\beta$ 42 with isolated mitochondria was dependent on the peptide concentration and did not seem to be saturable, again arguing against a protein-mediated interaction. A $\beta$  peptides behavior in an import reaction did not show any dependence on  $\Delta\psi_{mit}$  like for precursor proteins destined to matrix and IMM. Alkaline extraction experiments also indicated a peripheral membrane association. All together these results exclude a complete import of A $\beta$  peptides, but not a peripheral association between A $\beta$  peptides with the OMM.

Our observations of an apparent protease-resistance are independent from the presence of mitochondria and are linked to intrinsic properties of A $\beta$  peptides rather than representing imported protein material. Indeed, in mock samples as well when mitochondria were destroyed by detergent solubilization or by mechanical disruption, the A $\beta$ 42 band was still visible even at the highest concentration of proteases. Also in mock samples, A $\beta$ 40 showed a similar pattern. In line with our

results are data from the literature showing that both A $\beta$  peptides extracted from AD brains as well as synthetic A $\beta$  peptides spiked into brain homogenates acquired detergent-insolubility and resistance to protease digestion (Xiao et al, 2014). Furthermore, it was found that A $\beta$  conformers with the highest amyloidogenic capability and with high content of beta-sheet structure were more resistant to proteolytic digestion (Soto & Castano, 1996). Our experiments indicated that the presence of mitochondria promoted both aggregation propensity and protease-resistance of A $\beta$ 42. These results are supported by the literature (Murphy, 2007) (Henry et al, 2015), but further investigation is needed to explore the consequences of this observation.

In order to overcome the technical problems of differential centrifugation as an analysis of A $\beta$  peptide interaction with mitochondria, we utilized density gradient centrifugation as a method to separate protein aggregates from cell organelles like mitochondria (Sehlin et al, 2012). In these gradients, we observed ca. 20% of the total A $\beta$ 42 added to the experiment in the intermediate fractions, indicating a direct association with mitochondria (Figure 7E). In contrast, A $\beta$ 40 remained in the top fractions probably as monomers or small SDS-soluble aggregates. Interestingly, the presence of precursor proteins changed the behavior of A $\beta$ 42 as the amount of mitochondria-associated material decreased while the amount in the bottom fractions, representing aggregates increased. Additionally, in the presence of A $\beta$ 42 a considerable amount of the precursor protein itself was found in the aggregate fraction at the bottom of the gradient, indicating the formation of co-aggregates between A $\beta$  peptides and mitochondrial precursor proteins. We propose that a co-aggregation of precursor proteins and A $\beta$  peptides is the main reason for the strong inhibitory effect of mitochondrial protein import. A formation of high molecular weight aggregates and the concomitant reduction of the precursor solubility would significantly reduce their import competence. Several further observations support this co-aggregation model: a) correlating with the much stronger import inhibitory effect of A $\beta$ 42

compared to A $\beta$ 40, also the co-aggregation phenomenon was particularly pronounced in presence of A $\beta$ 42; b) The solubility of the precursor proteins was reduced in presence of A $\beta$ 42 as assayed by a centrifugation assay; c) together with A $\beta$ 42, precursor proteins formed large aggregates that are retarded in a filtration assay; d) in native PAGE experiments, precursor protein signals were shifted to a high molecular weight complex in the range of 700 kDa that co-purified with A $\beta$ 42. The aggregation behavior of precursor proteins was dependent on A $\beta$  peptide-concentration, supporting the concept of co-aggregation. Interestingly, recent results showing negative consequences of co-aggregation between cytosolic enzymes and A $\beta$  peptides support this AD-specific pathological mechanism. A co-aggregation between glycolytic glyceraldehyde-3-phosphate (GAPDH) and A $\beta$  peptides accelerated amyloidogenesis and promoted mitochondrial dysfunction as well as cell death *in vitro* and *in vivo* (Itakura et al, 2015). Our work therefore adds an important aspect concerning the deleterious consequences of A $\beta$  co-aggregation reactions during the etiology of neurodegenerative diseases. Many of amyloid diseases involve co-aggregation of different protein species (Penke et al, 2012; Sarell et al, 2013) although the pathological mechanisms are not always entirely clear. It is conceivable that amyloidogenic  $\beta$ -sheet peptides interact with many different endogenous proteins leading to sequestration and functional impairment (Olzscha et al, 2011).

Generally, A $\beta$  peptides have an intrinsic tendency to self-assemble into a range of different aggregates also under the conditions that we applied in our mitochondrial import assay (Snyder et al, 1994; Stine et al, 2003; Thal et al, 2015). Considering the intracellular space as a crowded environment, A $\beta$  peptides likely undergo multiple, largely non-specific interactions with any protein and lipid components of the cytosol. The import-competent state of mitochondrial preproteins is represented by an incompletely folded conformation that is prone to irregular interactions with A $\beta$  peptides and subsequent aggregation.

Already during the onset of the disease at the point at which the concentration of A $\beta$  peptides is increasing, the formation of co-aggregates with newly synthesized mitochondrial precursor polypeptides might progressively interfere with the import process. This would eventually result in a reduction or even loss of mitochondrial enzyme activities, in turn leading to the multitude of mitochondrial defects observed in AD patients and respective disease models (Wang et al, 2007). Hence, the observed strong inhibitory effect on mitochondrial protein import, in particular in case of the pathogenic A $\beta$ 42, strongly supports the hypothesis of a direct mitochondrial toxicity of A $\beta$  peptides on mitochondria in AD.

## Material and Methods

### Preparation of A $\beta$ peptides and mitochondrial treatment

The *Escherichia Coli* expressed human recombinant A $\beta$  peptides 1-40 (Ultra Pure HFIP; cat. A-1153-2) and 1-42 (Ultra Pure HFIP; cat. A-1163-2) used in this study were purchased from AJ Roboscreen GmbH (Leipzig, DE). Working solutions of both peptides were prepared as described (Stine et al, 2003). Briefly, the lyophilized peptides were dissolved in 100% 1,1,1,3,3,3-Hexafluoro-2-Propanol (Sigma-Aldrich) and distributed in low-binding micro-centrifuge tubes (VWR, DE). The solvent was allowed to evaporate over night at room temperature and the A $\beta$  peptide aliquots were stored at -80°C. Immediately prior to use, each aliquot was warmed to room temperature followed by a resuspension of the peptide film to a stock of 5 mM in dimethyl sulfoxide (AppliChem GmbH, DE) to remove any preexisting aggregated structures and to provide a homogeneous non-aggregated peptide preparation. After mixing well, the A $\beta$  peptide DMSO stock was freshly diluted with ice-cold distilled water to a final concentration of 100  $\mu$ M. This dilution was mixed and used immediately. All experiments with A $\beta$  peptides were performed in super-clear tubes (VWR, DE).

## Cell culture and isolation of mitochondria

HeLa Cells were cultured in RPMI 1640 medium with 10% heat-inactivated fetal calf serum, 2 mM L-glutamine, 100 units/ml penicillin, and 100 µg/ml streptomycin at 37 °C in a saturated humidity atmosphere containing 5% CO<sub>2</sub>. All the chemicals were bought from Gibco, Life Technologies, DE. The mitochondria were isolated from HeLa cells as described (Becker et al, 2012). Briefly, after harvesting and washing in PBS, cells were incubated for 40 min on ice with HMS-A buffer (0.22 M mannitol, 0.07 M sucrose, 0.02 M HEPES pH 7.4, 1 mM EDTA, 0.2% BSA, 1 mM PMFS). Then, cells were homogenized with a glass/Teflon homogenizer (B. Braun Melsungen AG, DE) followed by differential centrifugation steps to isolated mitochondria. The mitochondria were washed and resuspended in HMS-B buffer (0.22 M mannitol, 0.07 M sucrose, 0.02 M HEPES pH 7.4, 1 mM EDTA, 1 mM PMFS).

## Import of radiolabeled proteins into isolated mitochondria

After isolation of mitochondria, the import of radiolabeled precursor protein was performed as described (Becker et al, 2012). Radiolabeled proteins were synthesized through an *in vitro* transcription and translation using the mMMESSAGE mMACHINE transcription kit (Life Technologies, DE) and rabbit reticulocyte lysate (Promega, DE) in presence if [<sup>35</sup>S]-methionine/cysteine (PerkinElmer, DE). For the import reaction, mitochondria were diluted in import buffer (20 mM HEPES-KOH, pH 7.4, 250 mM sucrose, 5 mM magnesium acetate, 80 mM potassium acetate, 5 mM KPi, pH 7.4, 7.5 mM glutamate, 5 mM malate, 1 mM DTT, 2 mM ATP) to a final concentration of 50 µg/100µl. Where indicated, mitochondrial membrane potential ( $\Delta\psi_{mit}$ ) was dissipated by adding a mixture of 8 µM antimycin A (Sigma-Aldrich, DE), 0.5 µM valinomycin, and 2 µM oligomycin (Sigma-Aldrich, DE). All the import reactions were performed at 30 °C, stopped by addition of 50 µM valinomycin and placing the samples on ice. Non-imported/protease-accessible

mitochondrial proteins were digested by incubation with 100 µg/ml trypsin (Seromed, Biochrom KG, DE) for 30 min on ice and terminated by adding 800 µg/ml of trypsin inhibitor (Sigma-Aldrich, DE) and 1 mM PMFS (Carl Roth, DE). Then, mitochondria were washed in import buffer without substrates. Where indicated instead than trypsin, samples were treated with 25 µg/ml proteinase K (PK; Carl Roth, DE) on ice for 30 min before the addition of 1 mM PMSF. All samples were analyzed by tricine SDS-PAGE, Western blot, digital autoradiography and immunodecoration.

For two-step import reactions, mitochondrial inner membrane potential  $\Delta\psi_{mit}$  was first depleted with 1 µM carbonyl cyanide m-chlorophenyl hydrazone (CCCP). Mitochondria were incubated with radiolabeled preprotein for 30 minutes at 30 °C. After washing, the mitochondria were re-incubated for 30 minutes at 30 °C in energized import buffer supplemented with 2 mg/ml BSA to restore the membrane potential in presence or absence of 3.5 µM A $\beta$  peptides. Imported proteins were separated by tricine SDS-PAGE and detected by immunodecoration and digital autoradiography.

## BN-PAGE

To analyze mitochondrial protein complexes and A $\beta$  peptide aggregation states under native conditions, samples were analyzed by blue native (BN)-PAGE (Wittig et al, 2006). Isolated mitochondria were solubilized in BN-lysis buffer (20 mM Tris-HCl, pH 7.4, 50 mM NaCl, 10% glycerol, 1 mM EDTA, 1% digitonin, 1 mM PMFS). BN gel loading buffer (100 mM Bis-Tris, pH 7.0, 500 mM  $\epsilon$ -amino-n-caproic acid, 5% w/v Coomassie Brilliant Blue G250) was added samples were loaded on 5-16.5% BN gels. Native unstained protein standard (Novex, Life Technologies, DE) was used to estimate molecular weights of protein complexes. After running over-night, gels were equilibrated in SDS buffer (1% (w/v) SDS, 0.19 M glycine, 25 mM Tris) and blotted on PDVF membrane (Carl Roth GmbH, DE) followed by immunodecoration and digital autoradiography.

## **Sodium carbonate extraction**

After incubation of isolated and intact mitochondria with 3.5  $\mu$ M A $\beta$  peptides, a further incubation in 0.1 M Na<sub>2</sub>CO<sub>3</sub> solution (pH 11) was performed on ice for 30 min. Then, after withdrawal of a total sample, an ultra-centrifugation step was done in a Beckman TLA-55 at 45000 RPM (123,000 xg) for 40 min 4 °C. The pellets were resuspended in tricine sample buffer while the supernatants were precipitated with 72% trichloroacetic acid (TCA) followed by tricine SDS-PAGE, western blot and immunodecoration.

## **Sucrose density gradient centrifugation**

After incubation with A $\beta$  peptides and/or [<sup>35</sup>S]-Su9(70)-DHFR, isolated mitochondria and mock samples (without mitochondria) were loaded on a continuous sucrose gradient (25-50%) and centrifuged in a Beckman SW41 rotor at 33,000 rpm (135,000 xg) for 1h at 4° C. Then, fractions of 500  $\mu$ l were collected from the top of each gradient followed by 72% TCA precipitation. Protein pellets were resuspended in tricine loading buffer, separated by tricine SDS-PAGE and analyzed by Western blot and immunodecoration.

## **Membrane potential measurement in isolated mitochondria**

Mitochondrial membrane potential ( $\Delta\psi_{mit}$ ) was analyzed by potential-sensitive fluorescent dye tetramethylrhodamine ethyl ester (TMRE) (Molecular Probes, Invitrogen, DE). After incubation with A $\beta$  peptides, isolated mitochondria were resuspended in potential buffer (0.6 M sorbitol, 0.1% BSA, 10 mM MgCl<sub>2</sub>, 20 mM KPi, pH 7.2, 5 mM malate, 10 mM glutamate) and incubated with 1  $\mu$ M of TMRE for 30 min at 30 °C on ice. After washing away the excess of TMRE, the TMRE fluorescence was measured in a microplate reader (excitation 540 nm, emission 585 nm; Infinite M200 PRO, TECAN, DE).

## **Filter retardation assay**

To visualize the formation of aggregates and co-aggregates, a modified filter retardation assay (Scherzinger et al,

1997) was used. After incubation of radiolabeled precursor proteins with different amounts of A $\beta$  peptides for 30 min at 30 °C in energized import buffer, samples were filtered directly through cellulose acetate membrane (0.2  $\mu$ m pore size; GE Healthcare, DE) or nitrocellulose membrane (GE Healthcare, DE) using a dot blot filtration unit (SCIE-PLAS, DE). Proteins retarded on the membranes were analyzed by immunodecoration and digital autoradiography.

## **Miscellaneous methods**

All the chemicals using in this study were from Carl Roth GmbH or Sigma-Aldrich. Standard techniques were used for tricine SDS-PAGE, Western blot, and immunodecoration. After performing a tricine SDS-PAGE, samples were transferred on PVDF membrane (Carl Roth GmbH) followed by blocking in 1X TBS with 5% milk and immunodecoration. Signal detection was performed by enhanced chemiluminescence (SERVA Light Eos Ultra, Serva, DE). Used antibodies were: A $\beta$  6E10 (Covance SIG-39320); Tim23 (BD Bioscience 611222), Tom 20 (Santa Cruz SC-11415), Tom 40 (Santa Cruz SC-11414), SMAC (Santa Cruz SC-22766), MPP (Sigma-Aldrich HPA021648), Complex-I (Invitrogen 459100), Complex-II (Invitrogen 459200), Complex III (Santa Cruz SC-23986), Complex-IV (Cell Signaling 3E11), F<sub>1</sub> $\beta$  (Invitrogen A21351), Rabbit IgG-Peroxidase (Sigma Aldrich A6154) and Mouse IgG-Peroxidase (Sigma Aldrich A4416). Digital autoradiography of was performed using a FLA5100 phosphorimaging system (Fujifilm, DE). Quantitative analysis was done by ImageJ 64 (NIH, USA) and GraphPad Prism 6.0 (GraphPad Software, Inc, USA).

## **Acknowledgements**

We are grateful to U. Gerken for expert technical support and Prof. J. Walter from University of Bonn (Germany) for his critical comments. This work was supported by a fellowship from European Commission Framework Programs (Marie Curie Action 7th Framework Program - International Incoming Fellowship; to GC) and by a research grant from the

Deutsche Forschungsgemeinschaft  
(VO657/5-2; to WV).

## **Author contributions**

GC performed most of the experiments of this manuscript. CR performed the ANT3 import. GC and MB performed the sucrose density gradient experiments. GC and WV designed the study, supervised the experiments and wrote the manuscript.

## **Conflict of interest**

The authors declare that they have no conflict of interest.



## References

- Agostinho P, Pliassova A, Oliveira CR, Cunha RA (2015) Localization and trafficking of amyloid-beta protein precursor and secretases: Impact on Alzheimer's disease. *J Alzheimers Dis* **45**: 329-347
- Alikhani N, Guo L, Yan S, Du H, Pinho CM, Chen JX, Glaser E, Yan SS (2011) Decreased proteolytic activity of the mitochondrial amyloid-beta degrading enzyme, PreP peptidase, in Alzheimer's disease brain mitochondria. *J Alzheimers Dis* **27**: 75-87
- Anandatheerthavarada HK, Biswas G, Robin MA, Avadhani NG (2003) Mitochondrial targeting and a novel transmembrane arrest of Alzheimer's amyloid precursor protein impairs mitochondrial function in neuronal cells. *J Cell Biol* **161**: 41-54
- Becker D, Richter J, Tocilescu MA, Przedborski S, Voos W (2012) Pink1 kinase and its membrane potential (Deltapsi)-dependent cleavage product both localize to outer mitochondrial membrane by unique targeting mode. *J Biol Chem* **287**: 22969-22987
- Bitan G, Kirkitadze MD, Lomakin A, Vollers SS, Benedek GB, Teplow DB (2003) Amyloid beta -protein (A $\beta$ ) assembly: A $\beta$  40 and A $\beta$  42 oligomerize through distinct pathways. *Proc Natl Acad Sci USA* **100**: 330-335
- Chacinska A, Koehler CM, Milenkovic D, Lithgow T, Pfanner N (2009) Importing mitochondrial proteins: machineries and mechanisms. *Cell* **138**: 628-644
- Devi L, Prabhu BM, Galati DF, Avadhani NG, Anandatheerthavarada HK (2006) Accumulation of amyloid precursor protein in the mitochondrial import channels of human Alzheimer's disease brain is associated with mitochondrial dysfunction. *J Neurosci* **26**: 9057-9068
- Eckman CB, Eckman EA (2007) An update on the amyloid hypothesis. *Neurol Clin* **25**: 669-682, vi
- Endo T, Kohda D (2002) Functions of outer membrane receptors in mitochondrial protein import. *Biochim Biophys Acta* **1592**: 3-14
- Falkevall A, Alikhani N, Bhushan S, Pavlov PF, Busch K, Johnson KA, Eneqvist T, Tjernberg L, Ankarcrona M, Glaser E (2006) Degradation of the amyloid beta-protein by the novel mitochondrial peptidase, PreP. *J Biol Chem* **281**: 29096-29104
- Gouras GK, Tampellini D, Takahashi RH, Capetillo-Zarate E (2010) Intraneuronal beta-amyloid accumulation and synapse pathology in Alzheimer's disease. *Acta Neuropathol* **119**: 523-541
- Haass C, Selkoe DJ (2007) Soluble protein oligomers in neurodegeneration: lessons from the Alzheimer's amyloid beta-peptide. *Nat Rev Mol Cell Biol* **8**: 101-112
- Hansson Petersen CA, Alikhani N, Behbahani H, Wiehager B, Pavlov PF, Alafuzoff I, Leinonen V, Ito A, Winblad B, Glaser E, Ankarcrona M (2008) The amyloid beta-peptide is imported into mitochondria via the TOM import machinery and localized to mitochondrial cristae. *Proc Natl Acad Sci USA* **105**: 13145-13150
- Hardy J, Selkoe DJ (2002) The amyloid hypothesis of Alzheimer's disease: progress and problems on the road to therapeutics. *Science* **297**: 353-356
- Hardy JA, Higgins GA (1992) Alzheimer's disease: the amyloid cascade hypothesis. *Science* **256**: 184-185
- Head E, Lott IT (2004) Down syndrome and beta-amyloid deposition. *Curr Opin Neurol* **17**: 95-100
- Heiser V, Scherzinger E, Boeddrich A, Nordhoff E, Lurz R, Schugardt N, Lehrach H, Wanker EE (2000) Inhibition of huntingtin fibrillogenesis by specific antibodies and small molecules: implications for Huntington's disease

therapy. *Proc Natl Acad Sci USA* **97**: 6739-6744

Henry S, Vignaud H, Bobo C, Decossas M, Lambert O, Harte E, Alves ID, Cullin C, Lecomte S (2015) Interaction of A $\beta$ (1-42) amyloids with lipids promotes "off-pathway" oligomerization and membrane damage. *Biomacromolecules* **16**: 944-950

Itakura M, Nakajima H, Kubo T, Semi Y, Kume S, Higashida S, Kaneshige A, Kuwamura M, Harada N, Kita A, Azuma YT, Yamaji R, Inui T, Takeuchi T (2015) Glyceraldehyde-3-phosphate dehydrogenase aggregates accelerate amyloid-beta amyloidogenesis in Alzheimer disease. *J Biol Chem* **290**: 26072-26087

Jarrett JT, Berger EP, Lansbury PT, Jr. (1993) The C-terminus of the beta protein is critical in amyloidogenesis. *Ann NY Acad Sci* **695**: 144-148

Kaminsky YG, Tikhonova LA, Kosenko EA (2015) Critical analysis of Alzheimer's amyloid-beta toxicity to mitochondria. *Front Biosci* **20**: 173-197

Kummer MP, Heneka MT (2014) Truncated and modified amyloid-beta species. *Alzheimers Res Ther* **6**: 28

LaFerla FM, Green KN, Oddo S (2007) Intracellular amyloid-beta in Alzheimer's disease. *Nat Rev Neurosci* **8**: 499-509

Lustbader JW, Cirilli M, Lin C, Xu HW, Takuma K, Wang N, Caspersen C, Chen X, Pollak S, Chaney M, Trinchese F, Liu S, Gunn-Moore F, Lue LF, Walker DG, Kuppusamy P, Zewier ZL, Arancio O, Stern D, Yan SS, Wu H (2004) A $\beta$ AD directly links A $\beta$  to mitochondrial toxicity in Alzheimer's disease. *Science* **304**: 448-452

Mattson MP, Gleichmann M, Cheng A (2008) Mitochondria in neuroplasticity and neurological disorders. *Neuron* **60**: 748-766

Mawuenyega KG, Sigurdson W, Ovod V, Munsell L, Kasten T, Morris JC, Yarasheski KE, Bateman RJ (2010)

Decreased clearance of CNS beta-amyloid in Alzheimer's disease. *Science* **330**: 1774

Mossmann D, Vogtle FN, Taskin AA, Teixeira PF, Ring J, Burkhart JM, Burger N, Pinho CM, Tadic J, Loreth D, Graff C, Metzger F, Sickmann A, Kretz O, Wiedemann N, Zahedi RP, Madeo F, Glaser E, Meisinger C (2014) Amyloid-beta peptide induces mitochondrial dysfunction by inhibition of preprotein maturation. *Cell Metab* **20**: 662-669

Murphy MP, LeVine H, 3rd (2010) Alzheimer's disease and the amyloid-beta peptide. *J Alzheimers Dis* **19**: 311-323

Murphy RM (2007) Kinetics of amyloid formation and membrane interaction with amyloidogenic proteins. *Biochim Biophys Acta* **1768**: 1923-1934

Musiek ES, Holtzman DM (2015) Three dimensions of the amyloid hypothesis: time, space and 'wingmen'. *Nat Neurosci* **18**: 800-806

Olzscha H, Schermann SM, Woerner AC, Pinkert S, Hecht MH, Tartaglia GG, Vendruscolo M, Hayer-Hartl M, Hartl FU, Vabulas RM (2011) Amyloid-like aggregates sequester numerous metastable proteins with essential cellular functions. *Cell* **144**: 67-78

Pagani L, Eckert A (2011) Amyloid-Beta interaction with mitochondria. *Int J Alzheimers Dis* **2011**: 925050

Penke B, Toth AM, Foldi I, Szucs M, Janaky T (2012) Intraneuronal beta-amyloid and its interactions with proteins and subcellular organelles. *Electrophoresis* **33**: 3608-3616

Piaceri I, Rinnoci V, Bagnoli S, Failli Y, Sorbi S (2012) Mitochondria and Alzheimer's disease. *J Neurol Sci* **322**: 31-34

Roher AE, Esh CL, Kokjohn TA, Castano EM, Van Vickle GD, Kalback WM, Patton RL, Luehrs DC, Daugs ID, Kuo YM, Emmerling MR, Soares H, Quinn JF, Kaye J, Connor DJ, Silverberg NB, Adler CH, Seward JD, Beach TG, Sabbagh MN

(2009) Amyloid beta peptides in human plasma and tissues and their significance for Alzheimer's disease. *Alzheimers Dement* **5**: 18-29

Ryan MT, Voos W, Pfanner N (2001) Assaying protein import into mitochondria. *Methods Cell Biol* **65**: 189-215

Sannerud R, Annaert W (2009) Trafficking, a key player in regulated intramembrane proteolysis. *Semin Cell Dev Biol* **20**: 183-190

Sarell CJ, Stockley PG, Radford SE (2013) Assessing the causes and consequences of co-polymerization in amyloid formation. *Prion* **7**: 359-368

Scherzinger E, Lurz R, Turmaine M, Mangiarini L, Hollenbach B, Hasenbank R, Bates GP, Davies SW, Lehrach H, Wanker EE (1997) Huntingtin-encoded polyglutamine expansions form amyloid-like protein aggregates in vitro and in vivo. *Cell* **90**: 549-558

Sehlin D, Englund H, Simu B, Karlsson M, Ingelsson M, Nikolajeff F, Lannfelt L, Pettersson FE (2012) Large aggregates are the major soluble Aβ species in AD brain fractionated with density gradient ultracentrifugation. *PLoS One* **7**: e32014

Selfridge JE, E L, Lu J, Swerdlow RH (2013) Role of mitochondrial homeostasis and dynamics in Alzheimer's disease. *Neurobiol Dis* **51**: 3-12

Sirk D, Zhu Z, Wadia JS, Shulyakova N, Phan N, Fong J, Mills LR (2007) Chronic exposure to sub-lethal beta-amyloid (Aβ) inhibits the import of nuclear-encoded proteins to mitochondria in differentiated PC12 cells. *J Neurochem* **103**: 1989-2003

Snyder SW, Ladoro US, Wade WS, Wang GT, Barrett LW, Matayoshi ED, Huffaker HJ, Krafft GA, Holzman TF (1994) Amyloid-beta aggregation: selective inhibition of aggregation in mixtures of amyloid with different chain lengths. *Biophys J* **67**: 1216-1228

Soto C, Castano EM (1996) The conformation of Alzheimer's beta peptide determines the rate of amyloid formation and its resistance to proteolysis. *Biochem J* **314 ( Pt 2)**: 701-707

Stine WB, Jr., Dahlgren KN, Krafft GA, LaDu MJ (2003) In vitro characterization of conditions for amyloid-beta peptide oligomerization and fibrillogenesis. *J Biol Chem* **278**: 11612-11622

Swerdlow RH, Burns JM, Khan SM (2014) The Alzheimer's disease mitochondrial cascade hypothesis: progress and perspectives. *Biochim Biophys Acta* **1842**: 1219-1231

Thal DR, Walter J, Saito TC, Fandrich M (2015) Neuropathology and biochemistry of Aβ and its aggregates in Alzheimer's disease. *Acta Neuropathol* **129**: 167-182

Truscott KN, Wiedemann N, Rehling P, Muller H, Meisinger C, Pfanner N, Guiard B (2002) Mitochondrial import of the ADP/ATP carrier: the essential TIM complex of the intermembrane space is required for precursor release from the TOM complex. *Mol Cell Biol* **22**: 7780-7789

Wang X, Su B, Perry G, Smith MA, Zhu X (2007) Insights into amyloid-beta-induced mitochondrial dysfunction in Alzheimer disease. *Free Radic Biol Med* **43**: 1569-1573

Weller RO, Massey A, Kuo YM, Roher AE (2000) Cerebral amyloid angiopathy: accumulation of Aβ in interstitial fluid drainage pathways in Alzheimer's disease. *Ann NY Acad Sci* **903**: 110-117

Wirhlich O, Bayer TA (2012) Intraneuronal Aβ accumulation and neurodegeneration: lessons from transgenic models. *Life Sci* **91**: 1148-1152

Wirhlich O, Multhaup G, Bayer TA (2004) A modified beta-amyloid hypothesis: intraneuronal accumulation of the beta-amyloid peptide--the first step of a fatal cascade. *J Neurochem* **91**: 513-520

Wittig I, Braun HP, Schägger H (2006)  
Blue native PAGE. *Nat Protoc* **1**: 418-428

Xiao X, Yuan J, Qing L, Cali I, Mikol J, Delisle MB, Uro-Coste E, Zeng L, Abouelsaad M, Gazgalis D, Martinez MC, Wang GX, Brown P, Ironside JW, Gambetti P, Kong Q, Zou WQ (2014)  
Comparative Study of Prions in Iatrogenic and Sporadic Creutzfeldt-Jakob Disease. *J Clin Cell Immunol* **5**

Yano H, Baranov SV, Baranova OV, Kim J, Pan Y, Yablonska S, Carlisle DL, Ferrante RJ, Kim AH, Friedlander RM (2014)  
Inhibition of mitochondrial protein import by mutant huntingtin. *Nat Neurosci* **17**: 822-831

Zhang YW, Thompson R, Zhang H, Xu H (2011)  
APP processing in Alzheimer's disease. *Mol Brain* **4**: 3

## Figure legends

**Figure 1. Effect of A $\beta$  peptides on mitochondrial import of nuclear-encoded precursor proteins.** [ $^{35}$ S]-labeled radioactive precursor proteins were incubated with energized and isolated mitochondria from HeLa cell cultures in presence of same amounts (3.5  $\mu$ M) of A $\beta$ 40 and A $\beta$ 42 peptides. Import of the precursor of the mitochondrial malate dehydrogenase (MDH2) (**A**) and the artificial reporter construct Su9(86)-DHFR (**B**) for the indicated incubation times. After the import reaction, half of the samples (*lanes 4-6 and 9,10*) were treated with trypsin (100  $\mu$ g/ml) to remove non-imported preproteins. Imported proteins were analyzed by Tricine SDS-PAGE followed by Western blot, digital autoradiography and immunodecoration against A $\beta$  peptides. (**C**) Import of the adenine nucleotide translocator 3 (ANT3) in comparison with Su9(86)-DHFR. After import, all samples were treated with proteinase K (PK; 50  $\mu$ g/ml) and analyzed either by BN- (ANT3) or SDS-PAGE (Su9(86)-DHFR), Western blot and digital autoradiography. As control, immunodecoration against Tim23 was carried out. (**D**) Quantification of import inhibitory effect of A $\beta$  peptides. Import experiments with the precursor protein [ $^{35}$ S]-Su9(86)DHFR and different amounts of A $\beta$  peptides (0.007 up to 7.0  $\mu$ M) were performed as described above. The signals of processed and protease-resistant preprotein bands (*m-form*) were quantified using Image J. The amount of imported protein in the absence of A $\beta$  peptide was set to 100%. Mean values and standard deviation (*S.D.*) were determined for *n* = 3 independent experiments. *p*, precursor protein; *m*, mature processed form; *L*, loading control.

**Figure 2. Effect of A $\beta$  peptides on import-related mitochondrial functions.** (**A**) Mitochondrial membrane potential ( $\Delta\psi_{mit}$ ) was evaluated after treatment of energized mitochondria with increasing amount of A $\beta$  peptides as indicated, followed by incubation with the potential-dependent fluorescent dye TMRE. After removal of excess TMRE, fluorescence was determined by a spectrofluorometer (Infinite M200 Pro, TECAN). Mean values and standard deviation were determined from three independent experiments. (**B**) After treatment of isolated and energized mitochondria with A $\beta$  peptides (3.5  $\mu$ M), structure and composition of import translocase complexes were analyzed by BN-PAGE, SDS-PAGE, and western blotting techniques. Before loading, mitochondria were solubilized in a buffer containing 1% digitonin. Immunodecorations against components of the translocase complexes TOM and TIM23, responsible for the import or presequence-containing preproteins through the mitochondrial membranes, Tom20, Tom40, Tim23 (*lanes 1-6 and 9-14*) and A $\beta$  peptides (*lanes 7,8 and 15,16*) were performed.

**Figure 3. Mitochondrial import steps affected by A $\beta$  peptides.** (**A**) Binding of the precursor protein to the OMM import machinery receptors. After removing the  $\Delta\psi_{mit}$ , mitochondria were incubated for short time points (range of seconds) with A $\beta$  peptides and precursor protein [ $^{35}$ S]-Su9(70)DHFR. Half of the samples were incubated with proteinase K (PK; 50  $\mu$ g/ml) to digest not imported precursor protein. (**B**) Isolated mitochondria without  $\Delta\psi_{mit}$  were incubated with increasing amounts of A $\beta$ 40 and A $\beta$ 42 (as indicated) and precursor protein [ $^{35}$ S]-Su9(70)DHFR. (**C**) Separation of preprotein binding (*Binding*) to OMM from inner membrane translocation and processing steps (*Chase*). For precursor binding and insertion into the OMM,  $\Delta\psi_{mit}$  was dissipated by CCCP (1  $\mu$ M) during incubation with [ $^{35}$ S]-Su9(70)DHFR in presence (*lanes 11,12*) and absence of A $\beta$  peptides (*lanes 11 and 13-18*). To assay inner membrane translocation and processing (*Chase*), the  $\Delta\psi_{mit}$  was restored by addition of albumin (BSA; 2 mg/ml; *lanes 10-12 and 16-18*) in presence (*lanes 17,18*) and absence of A $\beta$  peptides. For comparison, a complete one-step import reaction of precursor protein [ $^{35}$ S]-Su9(70)DHFR was performed (*lanes 1-9*). All samples were analyzed by Tricine SDS-PAGE followed by Western blot, digital autoradiography and immunodecoration against A $\beta$  peptides and Tim23. *p*, mitochondrial precursor protein; *m*, mitochondrial mature form; *Mock*, control experiment in the absence of mitochondria.

**Figure 4. Pretreatment of isolated mitochondria with A $\beta$  peptides.** Isolated mitochondria were pre-treated with A $\beta$  peptides (3.5  $\mu$ M) for 30 minutes. After several washing steps,

mitochondria were re-isolated and incubated in an energizing buffer with precursor protein [<sup>35</sup>S]-Su9(86)DHFR for an import reaction in the absence of A $\beta$  peptides (*lanes 8-16*). For comparison, the precursor protein [<sup>35</sup>S]-Su9(86)DHFR was directly incubated with isolated and energized mitochondria and in mock samples (*mo*) in presence or absence of A $\beta$  peptides (*lanes 1-7*). Half of the samples were treated with proteinase K (PK; 50  $\mu$ g/ml) to digest not imported precursor protein. Samples were analyzed by Tricine SDS-PAGE followed by western blotting, digital autoradiography and immunodecoration against A $\beta$  peptides and control mitochondrial Tim23. *p*, precursor protein; *m*, mature form.

**Figure 5. Analysis of A $\beta$  peptides interaction with human mitochondria.** Isolated and energized mitochondria and mock (*mo*) samples (*lanes 6, 12*) were incubated with the same amount of A $\beta$ 40 (**A**) and A $\beta$ 42 (**B**) peptides (3.5  $\mu$ M) for different time points.  $\Delta\psi_{mit}$  was dissipated where indicated (*lanes 5 and 11*). Half of the samples were then treated with trypsin (100  $\mu$ g/ml; *lanes 1-6*). Increasing amounts of A $\beta$ 40 (**C**) and A $\beta$ 42 (**D**) peptides were incubated for 30 min in presence or absence (*Mock*) of energized mitochondria (0.5 mg/ml) and separated in insoluble (*Pellet*) and soluble (*Supernatant*) fractions. All samples were processed by Tricine SDS-PAGE followed by Western blot. As control, immunodecoration against mitochondrial Tom20, Tim23 and Tom40 proteins was performed. *WB*, Western blot.

**Figure 6. Membrane interaction behavior of A $\beta$  peptides.** (**A**) A $\beta$  peptides (3.5  $\mu$ M) were incubated with or without (*Mock*) intact and energized mitochondria followed by digestion with increasing amounts of trypsin (*lanes 1-4*). As controls, mitochondria were lysed after incubation by solubilization with 0.5% Triton X-100 (*lanes 5-8*) or sonication (*lanes 9-12*) before the addition of the trypsin. All the samples underwent TCA precipitation. (**B**) Dependence of the interaction between A $\beta$  peptides and isolated mitochondria on peripheral OMM receptors. Isolated mitochondria were pre-treated with the indicated trypsin concentrations to digest exposed OMM proteins. After trypsin inactivation, isolated mitochondria were re-isolated and incubated in an energized buffer with A $\beta$  peptides (3.5  $\mu$ M). (**C**) Alkaline extraction of A $\beta$  peptides from mitochondria and mock samples. A $\beta$  peptides (3.5  $\mu$ M) were incubated in presence or absence (*Mock*) of isolated and energized mitochondria. After re-isolation, mitochondria and mock samples were subjected to alkaline extraction as described under “Material and Methods” section. All samples were analyzed by Tricine SDS-PAGE and Western blot. As control, immunodecoration against the endogenous mitochondrial proteins such as SMAC (IMS), MPP (matrix), Tom40 (OMM), Tim23 (IMM), and Tom20 (OMM) was carried out. *WB*, Western blot; *T*, total; *P*, pellet; *S*, supernatant.

**Figure 7. Analysis of the interaction of A $\beta$  peptides and mitochondrial precursor proteins with mitochondria through density gradient centrifugation.** (**A**) Sucrose gradient centrifugation of A $\beta$ 40 (upper panels) and A $\beta$ 42 (lower panels) incubated with and without (*Mock*) isolated and energized mitochondria. (**B**) As control, a sucrose gradient of precursor protein [<sup>35</sup>S]-Su9(70)DHFR incubated with or without (*Mock*) isolated and energized mitochondria in the absence of A $\beta$  peptides was performed. (**C**, **D**) Sucrose gradients with or without (*Mock*) mitochondria incubated with precursor protein [<sup>35</sup>S]-Su9(70)DHFR in the presence of A $\beta$ 40 (**C**) or A $\beta$ 42 (**D**). Density gradient fractionations were performed as reported in “Materials and Methods” section. Samples were analyzed by tricine SDS-PAGE and Western blot. As control, immunodecorations against MPP and Tim23 were used. (**E**) Quantification of the A $\beta$ 42 band intensities incubated with mitochondria in the absence (**A**) or presence (**D**) of precursor protein [<sup>35</sup>S]-Su9(70)DHFR. Each value is the ratio between the intensity of the A $\beta$ 42 band in each fraction and the total sample (*T*). *WB*, Western blot; *p*, precursor form; *m*, mature form of the preprotein.

**Figure 8. Co-aggregation between A $\beta$  peptides and mitochondrial precursor protein.** Precursor protein [<sup>35</sup>S]-Su9(86)-DHFR was incubated in import buffer in presence or absence of the indicated amounts of A $\beta$  peptides. After incubation, samples were analyzed by the following techniques: (**A**) Tricine SDS-PAGE. Soluble fractions (*Supernatant*) were separated from the insoluble (*Pellet*) by centrifugation at 123000  $g$  as described in the “Material and

methods” section. Samples were analyzed by tricine SDS-PAGE. **(B)** Filter retardation assay. Samples were filtered directly through cellulose acetate and nitrocellulose membranes using a dot blot filtration unit as described in “Material and Methods” section. Proteins bound to both membranes were stained with Ponceau S. Bound A $\beta$  peptides were detected by immunodecoration and the precursor protein by digital autoradiography. **(C)** BN-PAGE. Samples were loaded on native PAGE as described in “Materials and Methods” and analyzed by Western blot. The precursor protein signal was detected by digital autoradiography and the A $\beta$  peptides by immunodecoration.

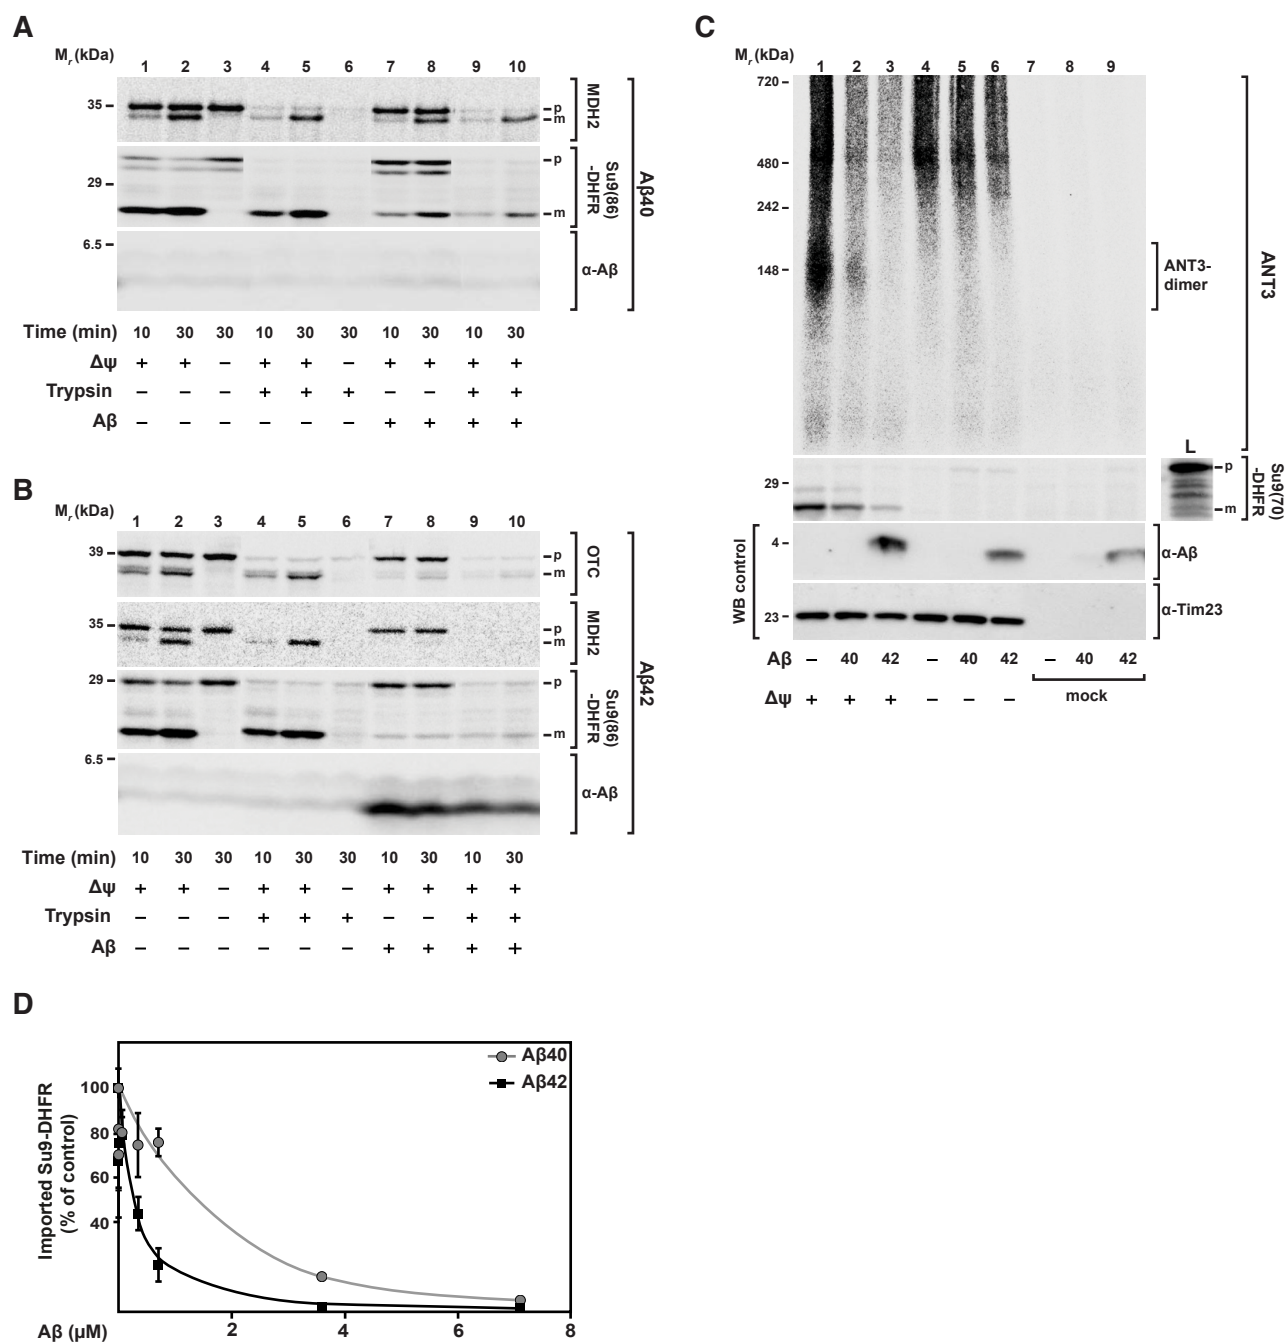



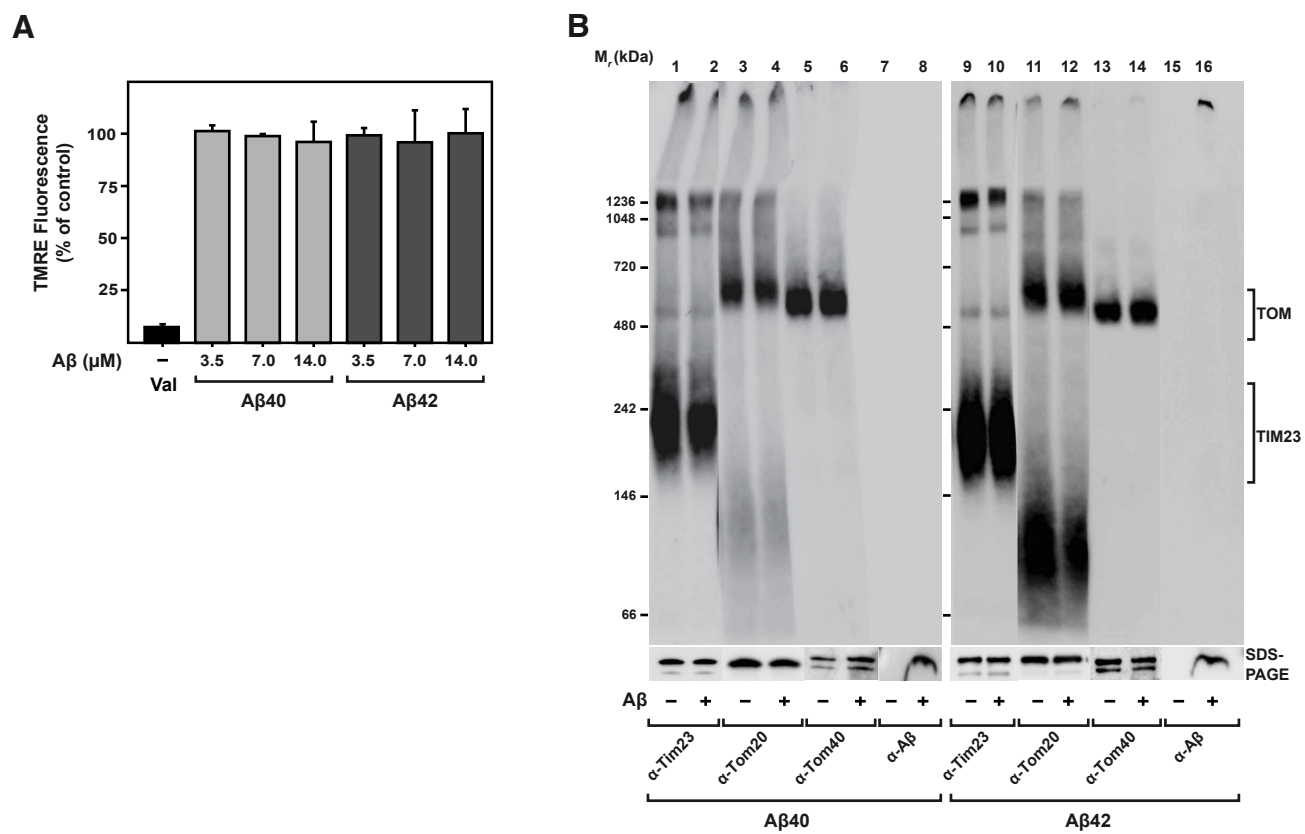

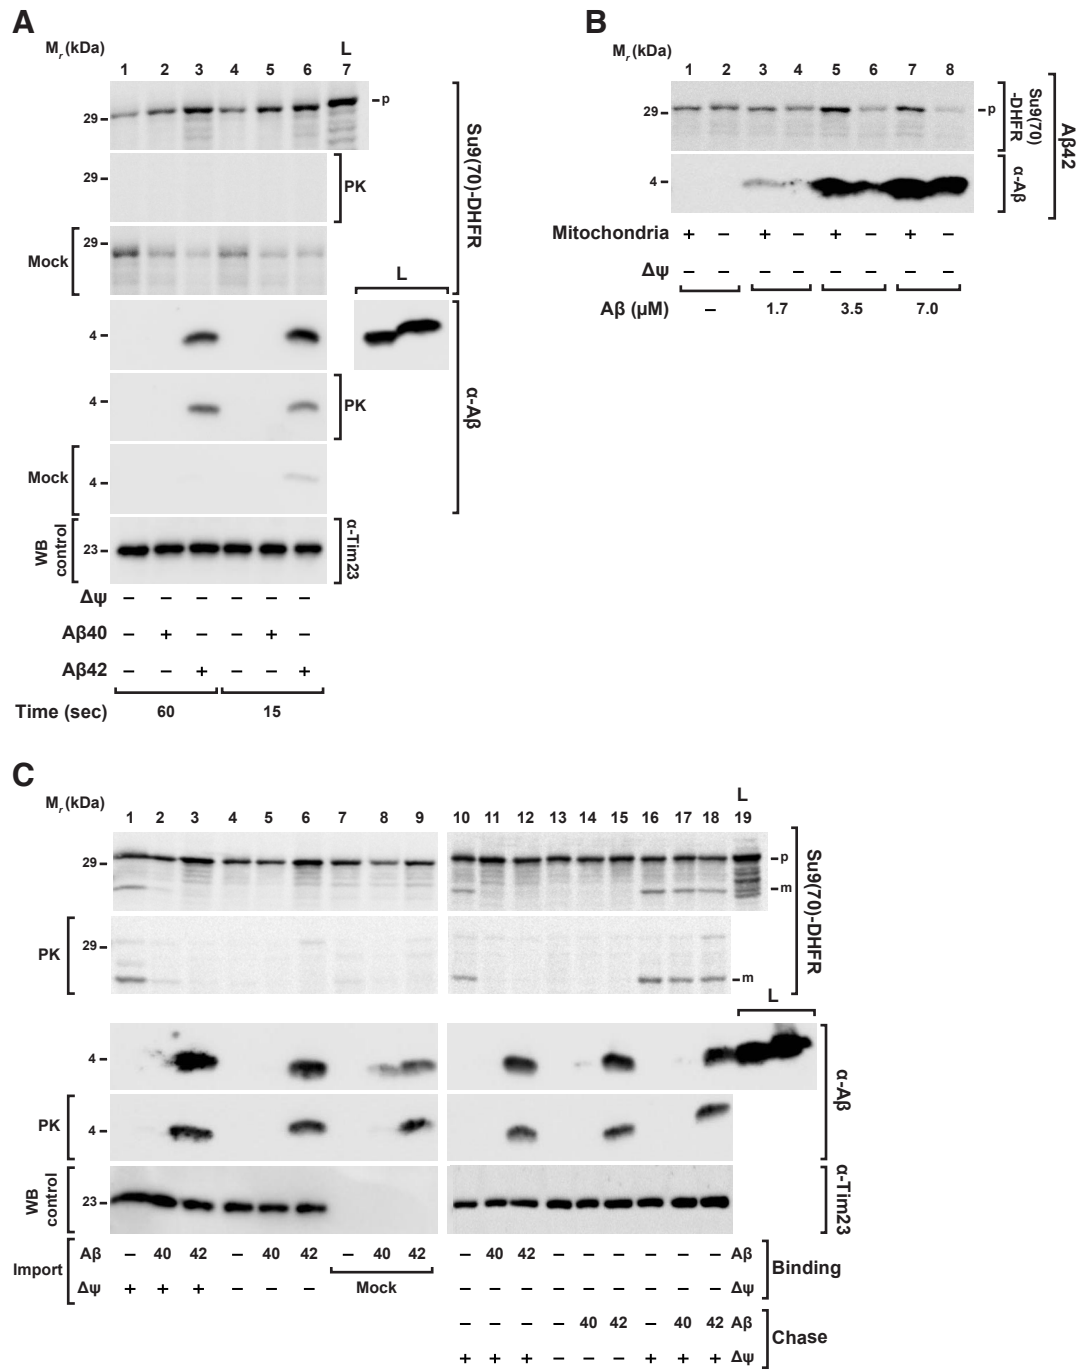

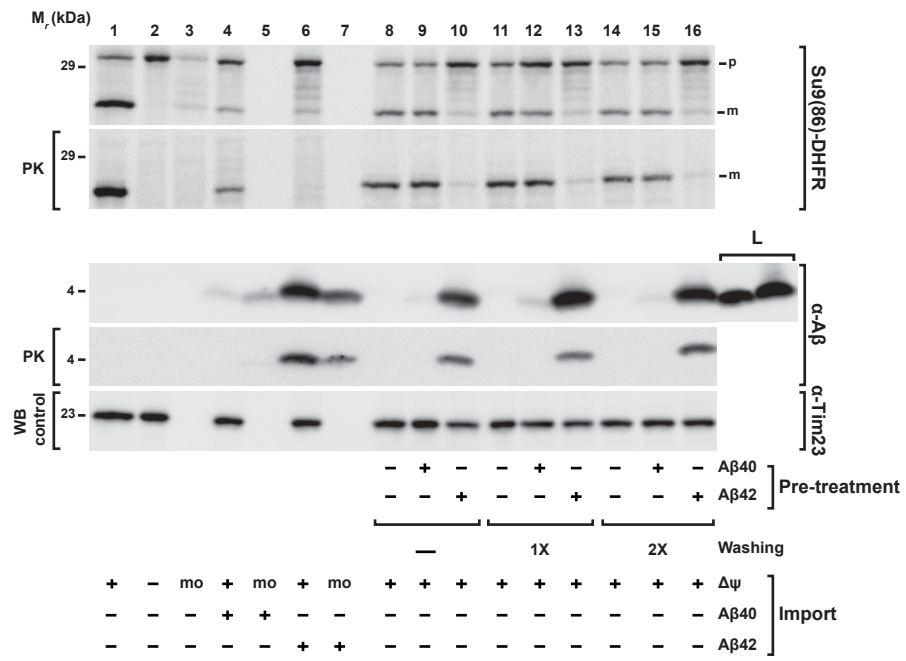

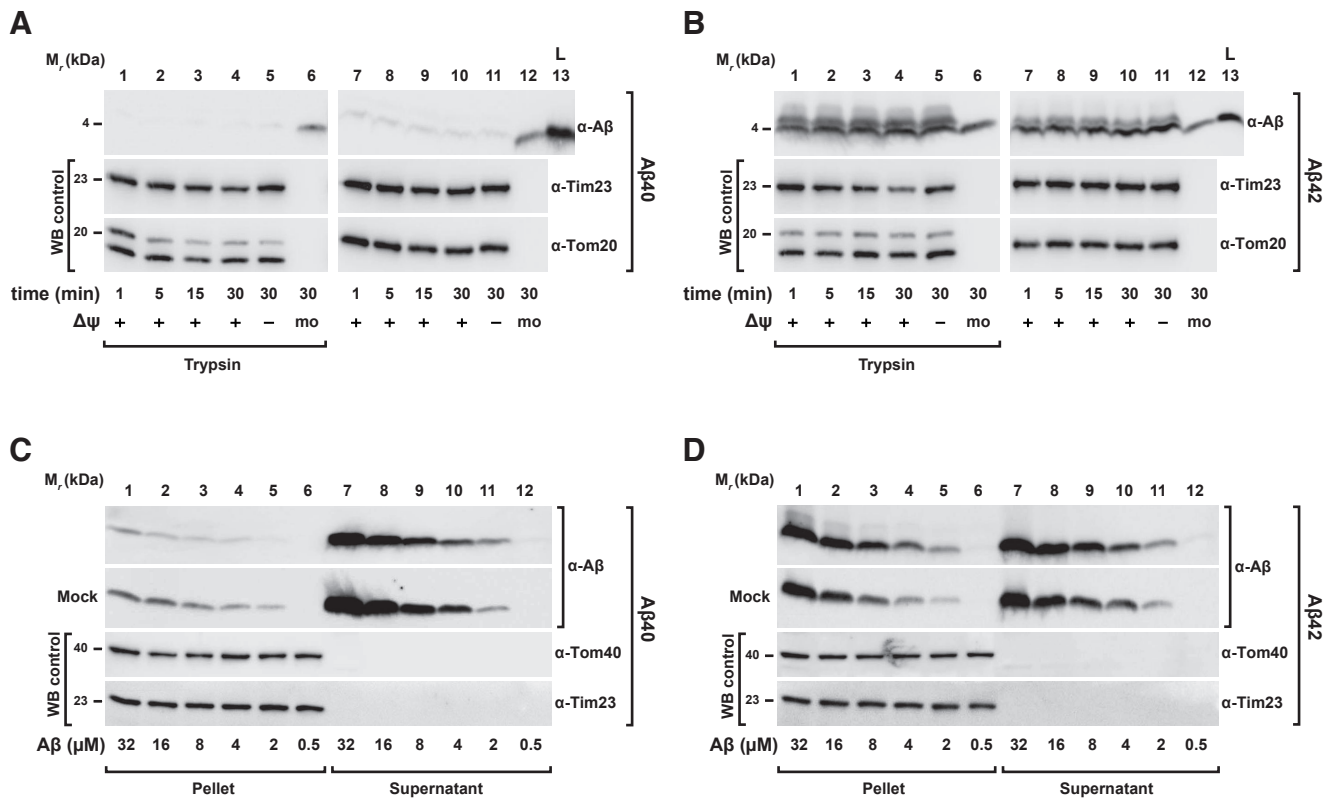

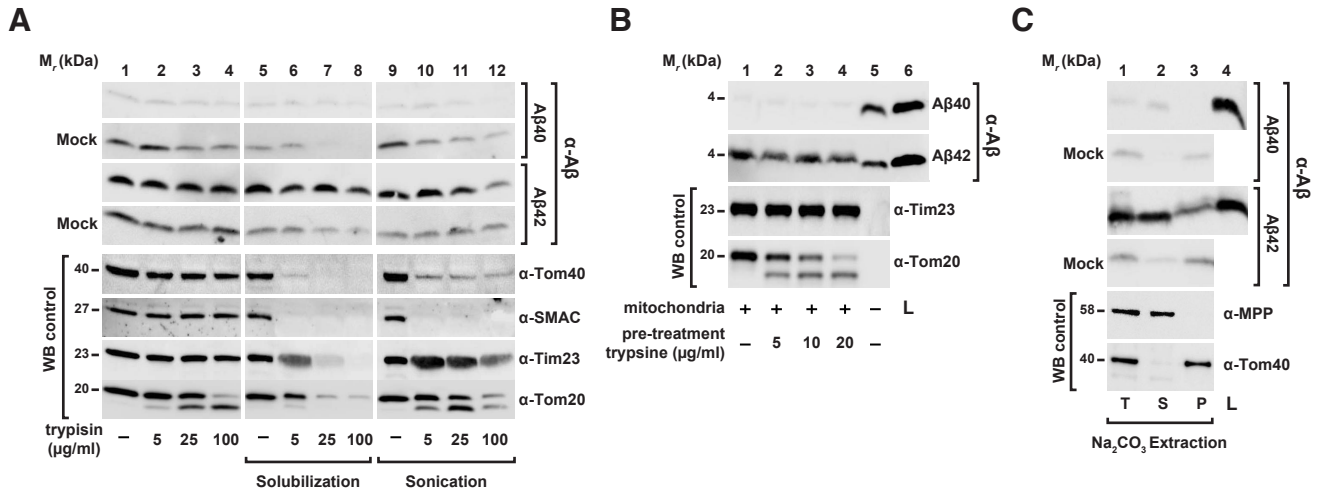

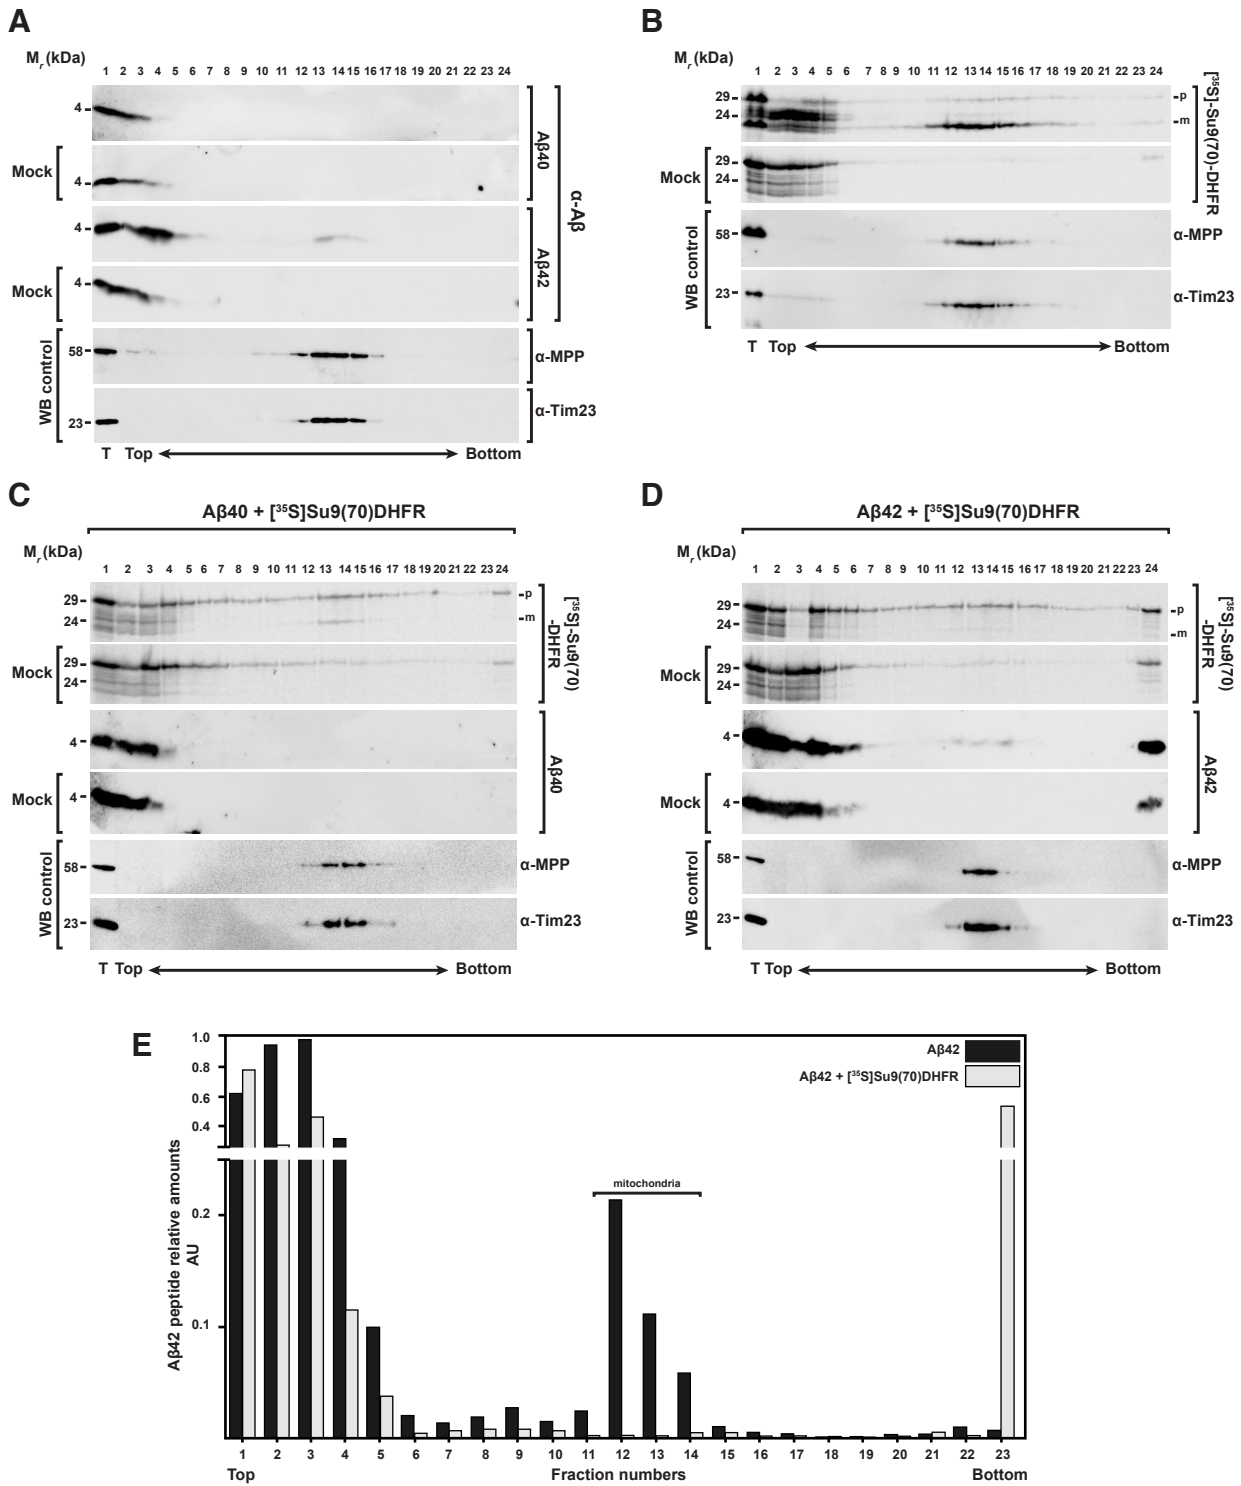

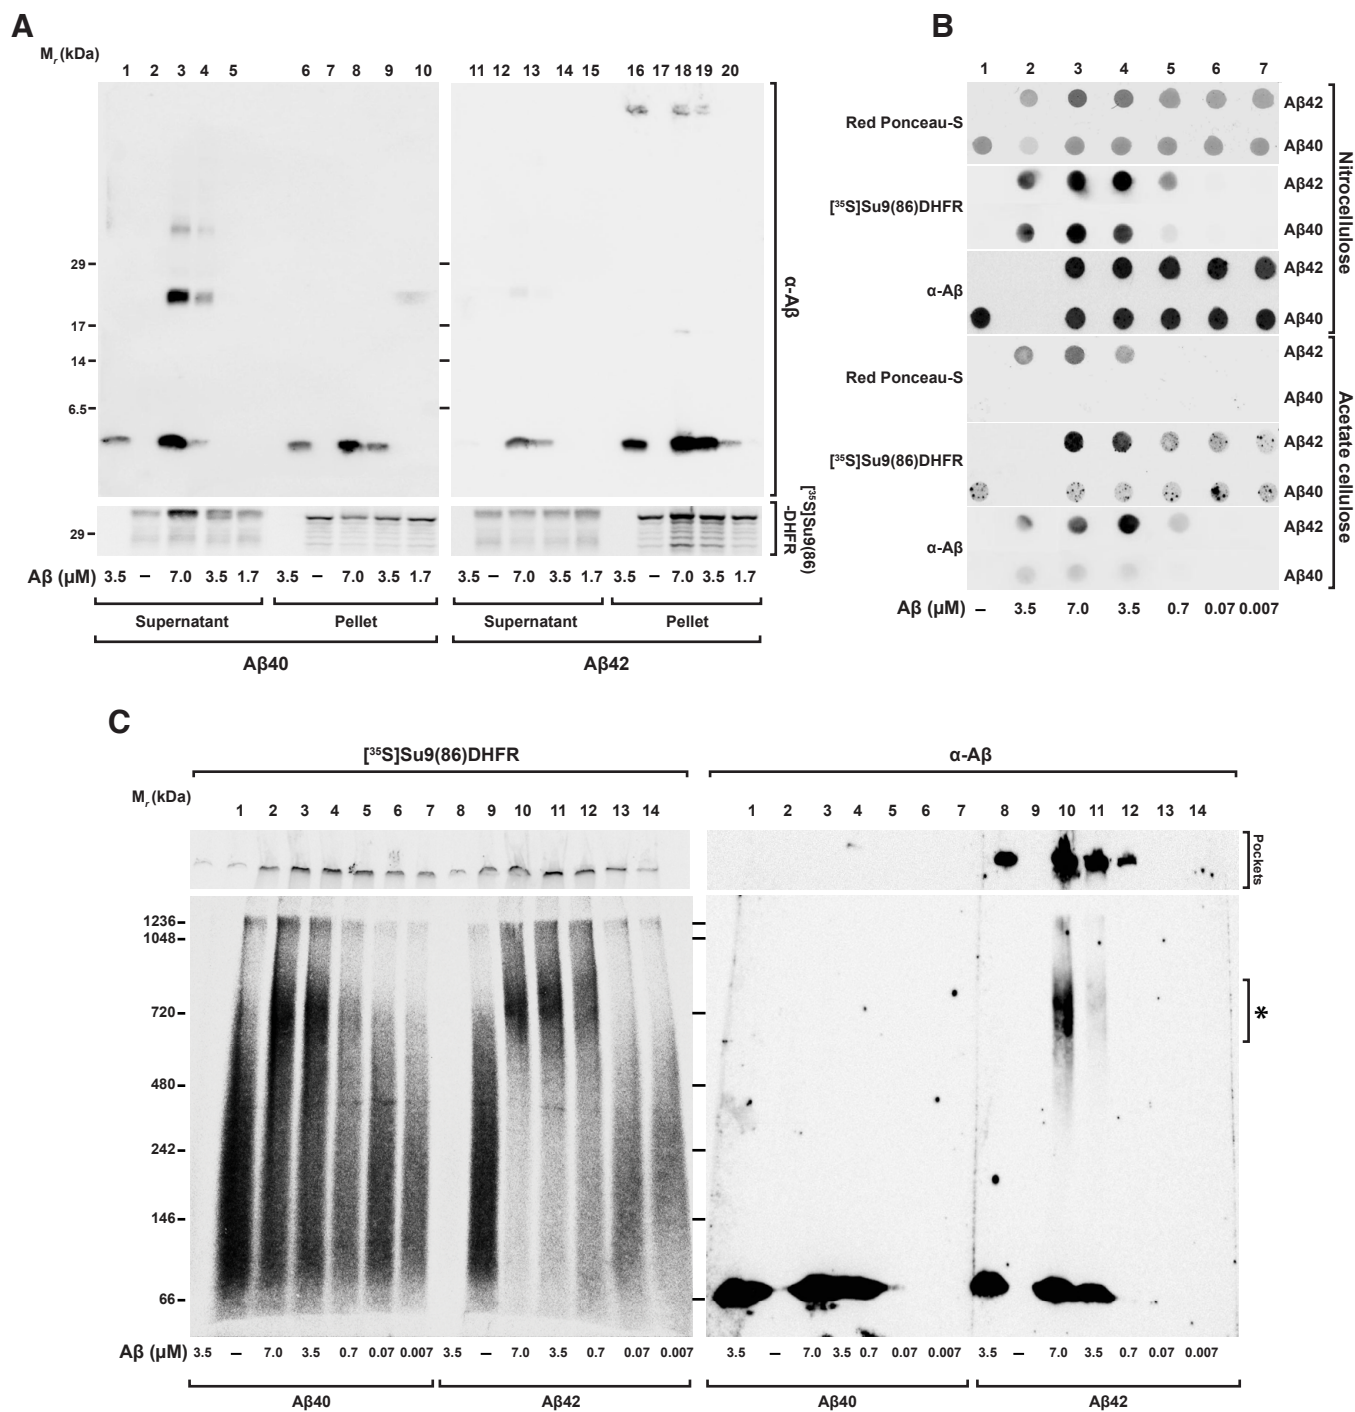

Source: http://biorxiv.org/content/10.1101/050617v1.full.pdf
